# Supplementary material for: Shorter or longer anticoagulation to prevent recurrent venous thromboembolism: systematic review and meta-analysis
Source: PubMed Central journal article supplement — BMJ Open. 2014 Jul 4;4(7):e005674. doi: 10.1136/bmjopen-2014-005674 (PMC4091261; doi:10.1136/bmjopen-2014-005674), 2014-07-04
Supplement: bmjopen-2014-005674.draft_revisions.pdf [file bmjopen-2014-005674.draft_revisions.pdf]

# BMJ Open

## Shorter or longer anticoagulation to prevent recurrent venous thromboembolism: systematic review and meta-analysis - Protocol

|                                 |                                                                                                                                                                                                                                                                                                                                                                                                                                                                                                                                                                                                                                                                                                                                                                     |
|---------------------------------|---------------------------------------------------------------------------------------------------------------------------------------------------------------------------------------------------------------------------------------------------------------------------------------------------------------------------------------------------------------------------------------------------------------------------------------------------------------------------------------------------------------------------------------------------------------------------------------------------------------------------------------------------------------------------------------------------------------------------------------------------------------------|
| Journal:                        | <i>BMJ Open</i>                                                                                                                                                                                                                                                                                                                                                                                                                                                                                                                                                                                                                                                                                                                                                     |
| Manuscript ID:                  | bmjopen-2014-005674                                                                                                                                                                                                                                                                                                                                                                                                                                                                                                                                                                                                                                                                                                                                                 |
| Article Type:                   | Protocol                                                                                                                                                                                                                                                                                                                                                                                                                                                                                                                                                                                                                                                                                                                                                            |
| Date Submitted by the Author:   | 17-May-2014                                                                                                                                                                                                                                                                                                                                                                                                                                                                                                                                                                                                                                                                                                                                                         |
| Complete List of Authors:       | Lopes, Luciane; UNISO, Pharmacie Science<br>Eikelboom, John; McMaster University, Department of Medicine, Division of Hematology and Thromboembolism<br>Spencer, Frederick; McMaster University, Medicine<br>Akl, Elie; McMaster University, Department of Clinical Epidemiology and Biostatistics; American University of Beirut, Department of Internal Medicine<br>Kearon, Clive; McMaster University<br>Neumann, Ignacio; McMaster University, Department of Clinical Epidemiology and Biostatistics<br>Schulman, Sam; McMaster University, Department of Medicine, Division of Hematology and Thromboembolism<br>Bhatnaga, Neera; McMaster University, Health Sciences Library<br>Guyatt, Gordon; McMaster University, Clinical Epidemiology and Biostatistics |
| <b>Primary Subject Heading</b>: | Cardiovascular medicine                                                                                                                                                                                                                                                                                                                                                                                                                                                                                                                                                                                                                                                                                                                                             |
| Secondary Subject Heading:      | Epidemiology, Evidence based practice                                                                                                                                                                                                                                                                                                                                                                                                                                                                                                                                                                                                                                                                                                                               |
| Keywords:                       | VASCULAR MEDICINE, Cardiology < INTERNAL MEDICINE, Anticoagulation < HAEMATOLOGY, Thromboembolism < CARDIOLOGY                                                                                                                                                                                                                                                                                                                                                                                                                                                                                                                                                                                                                                                      |
|                                 |                                                                                                                                                                                                                                                                                                                                                                                                                                                                                                                                                                                                                                                                                                                                                                     |

SCHOLARONE™  
Manuscripts

1  
2  
3  
4  
5 **Shorter or longer anticoagulation to prevent recurrent venous**  
6 **thromboembolism: systematic review and meta-analysis - Protocol**  
7  
8  
9

10 *Authors:*  
11

12  
13 **Luciane Cruz Lopes, PHD – Corresponding Author**

14 *Pharmaceutical Sciences Post graduate Course, University of Sorocaba, UNISO, Brazil.*

15 [luslopes@terra.com.br](mailto:luslopes@terra.com.br)  
16

17 **John Eikelboom**

18 *Department of Medicine, Division of Hematology and Thromboembolism, McMaster University,*  
19 *Hamilton, Ontario, Canada. [eikelbj@mcmaster.ca](mailto:eikelbj@mcmaster.ca)*

20 **Frederick A Spencer, MD**

21 *Department of Medicine, Division of Cardiology, McMaster University, Hamilton, Ontario,*  
22 *Canada. [fspence@mcmaster.ca](mailto:fspence@mcmaster.ca)*

23 **Elie A Akl**

24 *Department of Internal Medicine, American University of Beirut, Beirut, Lebanon. Department*  
25 *of Clinical Epidemiology and Biostatistics, McMaster University, Hamilton, Ontario, Canada*

26 *Department of Medicine, State University of New York at Buffalo, Buffalo, New York, USA*

27 [ea32@aub.edu.lb](mailto:ea32@aub.edu.lb)  
28

29 **Clive Kearon MB, PhD**

30 *Department of Medicine, Division of Hematology and Thromboembolism, McMaster University,*  
31 *Hamilton, Ontario, Canada [kearonc@mcmaster.ca](mailto:kearonc@mcmaster.ca)*

32 **Ignacio Neumann, MD, MSc,**

33 *Department of Clinical Epidemiology and Biostatistics, McMaster University, Hamilton,*  
34 *Canada AND Department of Internal Medicine, School of Medicine, Pontificia Universidad*  
35 *Catolica de Chile, Santiago, Chile.*

36 [ignacio.neumann@gmail.com](mailto:ignacio.neumann@gmail.com)  
37

38 **Sam Schulman, MD, PHD**

39 *Department of Medicine, Division of Hematology and Thromboembolism, McMaster University,*  
40 *Hamilton, Ontario, Canada. [schulms@mcmaster.ca](mailto:schulms@mcmaster.ca)*

41 **Neera Bhatnaga**

42 *Health Sciences Library McMaster University, Hamilton, Ontario, Canada.*

43 [bhatnag@mcmaster.ca](mailto:bhatnag@mcmaster.ca)  
44

45 **Gordon Guyatt, MD**

46 *Department of Clinical Epidemiology and Biostatistics, McMaster University, Hamilton,*  
47 *Ontario, Canada. [guyatt@mcmaster.ca](mailto:guyatt@mcmaster.ca)*  
48  
49  
50  
51  
52  
53  
54  
55  
56  
57  
58  
59  
60

## *Abstract*

Introduction: Venous thromboembolism (VTE) is a major disease associated with both short term and long-term morbidity and mortality. Patients with a VTE provoked by surgery or immobilization are at low risk of recurrence and do not require long term anticoagulation; those with a VTE and metastatic cancer are at high risk of recurrence and require lifetime thromboprophylaxis. In those at intermediate risk of recurrence, it remains controversial whether prolonging anticoagulation and thus incurring treatment burden and bleeding risk is warranted.

Methods and Analysis: We will conduct a systematic review and meta-analysis of RCTs enrolling patients with VTE at intermediate risk of recurrence and evaluating short term anticoagulation (12 weeks to 9 months initial therapy) versus longer term anticoagulation (at least 6 months additional anticoagulation beyond the course of treatment in the shorter arm).

Anticoagulation could consist of vitamin K antagonists or new oral anticoagulants. Outcomes of interest include recurrent non-fatal thrombosis (deep venous thrombosis and pulmonary embolism), major non-fatal bleeding and mortality. We will systematically search CINAHL, EMBASE, MEDLINE and the Cochrane Central Registry of Controlled Trials. Teams of two reviewers will, independently and in duplicate, screen titles and abstracts and complete full text reviews to determine eligibility, and subsequently abstract data and assess risk of bias in eligible trials. We will conduct meta-analyses to establish the effect of short-term versus long-term anticoagulation on the outcomes of interest and evaluate confidence in estimates (quality of evidence) using the GRADE approach.

Ethics and dissemination: Our review will facilitate evidence-based management of patients with unprovoked or recurrent VTE. For purposes of privacy and confidentiality, the systematic review will be limited to studies with de-identified data. The study will be disseminated by peer-review publication and conference presentation.

Registration: PROSPERO (CRD42014007620)

**Keywords:** VTE. Duration. Vitamin K antagonist. NOAC. RCT. Meta-analysis

## ARTICLE FOCUS:

In patients who have suffered a venous thromboembolic event (VTE – deep venous thrombosis or pulmonary embolus) at intermediate risk of recurrence (unprovoked or recurrent VTE but not cancer) what is the relative impact of anticoagulation for 3 to 9 months versus indefinite anticoagulation.

## KEY MESSAGE:

We will conduct a systematic review and meta-analysis of RCTs enrolling patients with VTE at intermediate risk of recurrence and evaluating short term anticoagulation (3 to 9 months initial therapy) versus longer term anticoagulation (at least 6 months additional anticoagulation beyond the course of treatment in the shorter arm). Anticoagulation could consist of vitamin K antagonists or new oral anticoagulants. Outcomes of interest will include recurrent non-fatal thrombosis (deep venous thrombosis and pulmonary embolism), major non-fatal bleeding and mortality

## STRENGTHS AND LIMITATIONS OF THIS STUDY

The methods of the review are state-of-art, including explicit eligibility criteria, a comprehensive search, independent duplicate assessment of eligibility, and use of the GRADE approach to assessing confidence in estimates of effect including independent duplicate assessment of risk of bias, precision, consistency, directness and publication bias. Our protocol represents a model for systematic review methods. Our results are likely to be limited by limitations in the primary studies.

## Introduction

Venous thromboembolism (VTE), which comprises deep-vein thrombosis (DVT) and pulmonary embolism (PE), is a major disease that results in considerable morbidity and mortality. Deep venous thrombosis or pulmonary embolism may occur in almost 2 in 1000 people each year and between 5% and 15% of people with untreated DVT may die from pulmonary embolism<sup>1 2</sup>. Thrombosis most commonly affects the deep veins of the lower limbs, but may affect other sites, including the upper limbs. Complications include pulmonary thromboembolism and post-thrombotic syndrome (PTS)<sup>3</sup>.

Risk factors for VTE include immobility, surgery (particularly orthopedic), malignancy, pregnancy, older age, estrogen therapy, and inherited or acquired prothrombotic clotting disorders<sup>4</sup>. In many patients, DVT remains asymptomatic and resolves without complications.. DVTs of concern are those that become symptomatic and are responsible for morbidity and mortality<sup>3</sup>. Patients with extensive proximal DVT have a substantial risk of developing the post-thrombotic syndrome, particularly if there is an ipsilateral recurrence with further valve destruction<sup>5</sup>. The average rate of fatal recurrent VTE after anticoagulation is discontinued has been estimated at 0.3 per 100 patient-years<sup>6</sup>. Based on observational data<sup>7 8</sup>, authors of the ninth iteration of the American College of Chest Physicians antithrombotic guidelines<sup>9</sup> estimated that in patients with unprovoked proximal DVT or PE the risk of recurrence in the first year after discontinuation of anticoagulation is 10% with a risk of 5% per year thereafter (i.e. 30% at 5 years).

A consensus exists regarding the need for anticoagulant treatment, usually with vitamin K antagonists (VKA) or with novel oral anticoagulants (NOAC) for patients with venous thromboembolism. Whereas clinicians agree on the need for 3 to 6 months of anticoagulation after the diagnosis of venous thromboembolism (VTE), opinions regarding optimal duration of secondary prophylaxis differ. Although the prevention of recurrence is certainly desirable, the risk of major bleeding, together with the burden of therapy and cost, makes long-term treatment potentially problematic.

1  
2  
3  
4  
5 The risk-to-benefit ratio is highly dependent of the risk of recurrence of VTE which differs  
6 according to the presence or absence of reversible predisposing factors, location of the  
7 thrombosis, patient age, the presence of comorbid conditions, and intrinsic predispositions to  
8 thrombosis (inherited and acquired thrombophilia disorders). Guidelines suggest that the risk of  
9 recurrence is sufficiently low after a DVT provoked by temporary immobilization or lower limb  
10 fracture that treatment beyond 6 months is not in these patients' best interest. Further, there is  
11 agreement that lifelong anticoagulation is warranted patients at highest risk of recurrence (i.e.,  
12 patients with active metastatic cancer). The controversy regarding treatment beyond 6 months is  
13 restricted to those with intermediate risk<sup>10 11</sup>. These patients include those whose VTE was  
14 unprovoked or whose VTE, if provoked, has happened more than once (recurrent VTE).  
15  
16  
17  
18  
19  
20  
21  
22  
23

24 To make optimal decisions, patients and clinicians need best evidence estimates of benefits and  
25 harms of short versus long-term anticoagulation. In the trials included in previous systematic  
26 reviews of this topic the anticoagulants administered were Vitamin K antagonists<sup>12-15</sup>. Recent  
27 randomized trials have evaluated longer and shorter administration of NOACs. Therefore, we  
28 will update a systematic review and meta-analysis of the relative benefits and harms of longer  
29 versus shorter periods of anticoagulation in patients at intermediate risk of recurrence. Our  
30 primary question will be the impact of indefinite anticoagulation versus discontinuing  
31 anticoagulation after 3 to 9 months on the outcomes of interest. By indefinite anticoagulation we  
32 mean continuing anticoagulation until changes in circumstances would mandate a  
33 discontinuation. For many such patients, we would anticipate lifetime anticoagulation.  
34  
35  
36  
37  
38  
39  
40  
41  
42

## 43 *Methods/design*

### 44 **Protocol and registration**

45  
46 Our protocol is registered on PROSPERO (CRD42014007620), <http://www.crd.york.ac.uk/PROSPERO>.  
47  
48  
49

### 50 **Issues in defining trial eligibility**

51  
52 Trials investigating the effect of prolonged anticoagulation on the risk of VTE recurrence vary in  
53 terms of the duration of anticoagulation in the shorter and longer duration arms. They also differ  
54 in the nature of populations enrolled. These differences create challenges in defining study  
55 eligibility criteria.  
56  
57  
58  
59  
60

1  
2  
3  
4  
5 In defining eligibility criteria any systematic review faces tension between broad eligibility  
6 criteria, which enhance precision of effect estimates and generalizability of results, and narrow  
7 criteria, which decrease the risks of heterogeneity and of generating pooled estimates that are not  
8 applicable to the range of patients and interventions included. A reasonable strategy for dealing  
9 with this tension, which we will adopt, is to choose relatively broad but clinically plausible  
10 criteria and then explore possible sources of heterogeneity. Therefore, although standard shorter-  
11 term anticoagulation is up to 6 months, we are including trials in which the shorter-term arm  
12 received anticoagulation up to 9 months. For the longer-term arm, we will accept any trial in  
13 which the duration of treatment is at least six months longer than in the shorter-term arm. We  
14 will conduct subgroup analyses focusing on the duration of therapy in both the shorter and  
15 longer-term arms.  
16  
17  
18  
19  
20  
21  
22  
23  
24

25 As we described in the background, the controversy regarding duration of anticoagulation is  
26 focused on patients in the intermediate risk category. Typically, these are patients with  
27 unprovoked VTE or recurrent VTE (provoked and unprovoked), but definitions might differ  
28 across trials. Thus, ideally, all patients included in the trials would fall into these risk groups. It  
29 would be inappropriate, however, to exclude trials in which most but not all patients fit this  
30 description. We will include any study in which, according to the definition used in the study at  
31 least 50% of patients fall into one of these risk groups. If there is appreciable heterogeneity in  
32 the proportion of patients in these risk categories we will conduct subgroup analyses based on  
33 this variability.  
34  
35  
36  
37  
38  
39  
40  
41  
42

### 43 Eligibility criteria

#### 44 Inclusion

45 **Patients:** Studies must include patients with DVT and/or PE in whom at least 50% have a first  
46 unprovoked (no apparent clinical risk factor<sup>16</sup> VTE, or a second or subsequent VTE (can be  
47 provoked or unprovoked) in the absence of cancer.  
48  
49  
50  
51  
52

53 **Intervention shorter duration treatment:** Studies must include an arm in which patients are  
54 anticoagulated with either vitamin K antagonists or novel anticoagulants for at least 12 weeks,  
55 but no longer than 9 months.  
56  
57  
58  
59  
60



1  
2  
3  
4  
5 **Intervention longer duration of treatment:** Studies must include an arm in which patients are  
6 anticoagulated with either vitamin K antagonists or novel anticoagulants for at least six months  
7 longer than in the shorter duration treatment arm.  
8  
9

10  
11 **Outcomes:** Trials must report on at least one of the following outcomes: recurrent VTE, DVT,  
12 fatal and non-fatal pulmonary embolus confirmed by objective testing (for DVT, venography or  
13 ultrasonography; for PE radiological imaging including ventilation/perfusion scanning, CT  
14 pulmonary angiography, MRI, conventional angiography, or autopsy), fatal and non-fatal  
15 serious/important bleeding episodes, post thrombotic syndrome, quality of life and total  
16 mortality.  
17  
18  
19  
20  
21

22  
23 **Type of study and design:** We will include only randomized controlled trials (RCT). We will  
24 include two types of RCT designs. In one design, patients, at the outset of VTE, are randomized  
25 to shorter or longer anticoagulation. In the alternative design all patients undergo the short-  
26 course anticoagulation regimen. They are then randomized to stop anticoagulation or to a further  
27 period of anticoagulation. We will include studies in which patients undergo shorter-term  
28 treatment with an anticoagulant, most often VKA, and then receive a new anticoagulant versus  
29 placebo.  
30  
31  
32  
33  
34  
35

### 36 **Exclusion:**

37 We will exclude studies enrolling only pure populations of high-risk patients, such as those with  
38 protein S or C deficiency or pregnancy.  
39  
40  
41  
42

### 43 **Information sources and search**

44  
45 We will screen all RCTs reviewed in the 9th iteration of the American College of Chest  
46 Physicians antithrombotic guidelines and then will conduct additional search from January 2011  
47 forward, six months prior (to account for lag in indexing) to the date the comprehensive search  
48 on the topic for the 9<sup>th</sup> iteration ACCP antithrombotic guidelines. We will search OVID Medline,  
49 EMBASE, Cochrane Central Registry of Controlled Trials (CENTRAL) and CINAHL with no  
50 language restriction. An experienced librarian (NB) developed a sensitive search strategy for this  
51 (see **Additional file 1**). We will scan the bibliographies of all systematic reviews and meta-  
52 analyses as well as all eligible primary studies for additional relevant articles.  
53  
54  
55  
56  
57  
58  
59  
60



## Study selection

Following a calibration exercise, reviewers will work in pairs to screen, independently and in duplicate, titles and available abstracts of identified citations. We will acquire the full text publication of any article that either reviewer judges as potentially eligible. The same reviewer teams will, following a second calibration exercise, independently apply eligibility criteria to the full text of potentially eligible trials using standardized forms. They will resolve disagreements by consensus or, if a discrepancy remains, through discussion with an arbitrator (GHG). We will measure inter-rater agreement for full text eligibility and assessment of risk of bias using the Kappa statistics. Values of kappa between 0.40 and 0.59 have been considered to reflect fair agreement, between 0.60 and 0.74 to reflect good agreement and 0.75 or more to reflect excellent agreement<sup>17</sup>.

## Data collection process and data items

Using pilot tested standardized forms (see **Additional file 2**) and following a calibration exercise, teams of two reviewers will extract data independently and in duplicate from each eligible study. Data abstracted will include details on the study methodology, participants, intervention, control, and all reported patient-important outcomes. For each outcome, we will record number of patients enrolled in each study arm, and the number of patients for whom final follow-up data is available, and the number of events in each study group.

Reviewers will resolve disagreements by discussion, and one arbitrator (GHG) will adjudicate unresolved disagreements. We will contact the authors of each study to clarify any issues of uncertainty in the data abstraction and to ensure that our abstraction is correct.

Reviewers will independently extract details of the anticoagulation regimens in both the shorter and longer duration arms. Outcomes will include death; cause-specific mortality (PE or bleeding); recurrent non-fatal VTE (DVT and pulmonary embolus) and non-fatal serious/important bleeding. We will document definitions of serious/important bleeding in each study.

### Risk of bias in individual studies

Reviewers will assess risk of bias within each study with a modified Cochrane risk of bias instrument<sup>18</sup> which assesses the following key domains: randomization sequence generation; allocation concealment; blinding of participants, healthcare professionals, outcome assessors, data collectors, and data analysts; incomplete outcome data; selective outcome reporting; and other sources of bias which will include differential intensity of surveillance for VTE and bleeding in the short and long arms, and premature cessation of follow-up (for instance, no follow-up for bleeding in the short arm after a VTE and resumption of anticoagulation). We will consider as a criterion of risk of bias whether the investigators specify a total surveillance period equal in length for the longer and shorter arms (i.e., same follow-up period from the time of randomization) versus a total surveillance period that is different (e.g., same follow-up period from the time of stopping anticoagulation) or not specified. Reviewers will input response options of ‘definitely yes’, ‘probably yes’, ‘probably no’, and ‘definitely no’ for each of the domains, with ‘definitely yes’ and ‘probably yes’ ultimately assigned low risk of bias and ‘definitely no’ and ‘probably no’ assigned high risk of bias<sup>19</sup>. Reviewers will resolve disagreements by discussion, and one arbitrator (GHG) will adjudicate unresolved disagreements.

### Meta-analysis and data synthesis

Data regarding VTE, serious/important bleeding, mortality and person-time at risk will be extracted by 2 independent reviewers using a standardized form, with adjudication by a third reviewer in cases of disagreement. Given our primary interest in short term versus indefinite anticoagulation, in studies with follow-up after discontinuation of anticoagulation in the long arm, we will try to identify events that occurred in either arm after the scheduled discontinuation of anticoagulation in the long arm. We will exclude such events in the primary analysis.

For each study, incidence rates in events per person-year at risk will be calculated for the outcomes of recurrent VTE and serious/important bleeding. We have chosen events per person-years rather than number of people with events to account for differential length of follow-up within individual studies and across studies, and the possibility of multiple events in a single

1  
2  
3  
4  
5 individual. When investigators do not report person-time data (either directly or indirectly  
6 through a Kaplan-Meier survival curve), the person-time of the interval will be estimated by  
7 multiplying the number of participants present at the beginning of the interval by the duration of  
8 the interval and subtracting person-time for events occurring within the interval. For this  
9 calculation we will assume that events will be equally likely throughout the interval unless data  
10 to the contrary are in the report.  
11

12 Our estimates of study heterogeneity will be informed using the p-value for  $\text{Chi}^2$  for  
13 heterogeneity, and the  $I^2$  statistic where 0-40% may be unimportant heterogeneity, 30-60%  
14 moderate, 50-90% substantial and 75-100% considerable heterogeneity<sup>44</sup>. We will explore  
15 heterogeneity by conducting the five a priori subgroup analyses using a z-test to test for  
16 interaction<sup>20</sup>.  
17  
18  
19  
20  
21  
22  
23  
24  
25

### 26 **Assessment of heterogeneity and subgroup analyses**

27  
28 We will explore heterogeneity using sub-group hypotheses, which apply to bleeding and VTE  
29 outcomes and mortality and are framed as effects in longer versus shorter duration  
30 anticoagulation. We postulate that larger reductions in thrombosis, and larger increases in  
31 bleeding, will occur in the following situations: i) when the shorter duration anticoagulation arm  
32 is three months or less versus longer than 3 months; ii) when the longer duration anticoagulation  
33 arm is more than 12 months longer than the shorter duration arm versus 12 months or less;; iii)  
34 studies in which the number of risk of bias domains judged as 'high risk' is greater than the  
35 median will have larger effects than studies in which that number is less than the median. iv)  
36 when therapy is a NOAC versus warfarin with target INR 2.0 or greater) versus warfarin lower  
37 boundary of target INR less than 2.0); v) when anticoagulation was continued until the end of the  
38 study or in which we can exclude events that occurred in either arm after timing of cessation of  
39 anticoagulation in the long arm versus follow-up continued after anticoagulant stopped and not  
40 possible to identify and exclude events that occurred after cessation of anticoagulation in the  
41 long arm.  
42  
43  
44  
45  
46  
47  
48  
49  
50  
51  
52  
53  
54

### 55 **Confidence in pooled estimates of effect**

1  
2  
3  
4  
5 Two reviewers will, independently and in duplicate, assess the confidence in effect estimates for  
6 each outcome using the GRADE (Grading of Recommendations, Assessment, Development and  
7 Evaluation) rating system<sup>21</sup>. In the GRADE system of rating quality of evidence for each  
8 outcome, randomized trials begin as high quality evidence, but may be rated down by one or  
9 more of five categories of limitations<sup>22</sup>. The GRADE working group has provided detailed  
10 guidance regarding judgments for each of these criteria: (1) risk of bias<sup>23</sup>, (2) inconsistency<sup>24</sup>, (3)  
11 indirectness<sup>25</sup>, (4) imprecision<sup>26</sup>, and (5) publication bias<sup>27</sup>.  
12  
13  
14  
15  
16  
17  
18

19 For assessing the impact of loss to follow-up across studies, we will conduct sensitivity analyses  
20 making progressively more stringent assumptions regarding loss to follow-up in intervention and  
21 control groups. The extent to which point estimates and confidence intervals differ in these  
22 sensitivity analyses will determine whether we rate down for risk of bias<sup>28</sup>.  
23  
24  
25  
26  
27

28 We anticipate that “number of patients enrolled minus number of patients for whom final follow-  
29 up is available” may include: i. unexplained losses to follow-up (lost contact), ii. explained  
30 losses to follow-up (e.g., followed until patient moved), iii. Followed until they had a recurrent  
31 VTE (or lost to follow-up for other complications such as death, or bleeding from restarted  
32 anticoagulation).  
33  
34  
35  
36

37 With respect to precision, the GRADE guidance notes that meta-analyses of small trials can  
38 provide evidence of benefit with confidence intervals that appear to convincingly exclude no  
39 effect; however, the results of reviews of such studies have often been subsequently refuted by  
40 larger trials<sup>26</sup>. To address this potential concern in cases in which our meta-analysis suggests  
41 benefit but the sample size is less than the optimal information size (OIS; the number of patients  
42 generated by a conventional sample size calculation for a single trial) we will rate down the  
43 quality for imprecision. For the purposes of calculating the OIS we will assume, for binary  
44 variables a relative risk reduction or increase (delta) of 25%, an alpha of 0.05, and a beta of 0.20,  
45 and a median baseline risk from the available studies.  
46  
47  
48  
49  
50  
51  
52  
53  
54  
55  
56  
57  
58  
59  
60

1  
2  
3  
4  
5 For each outcome we will assess publication bias by visually observing asymmetry of the funnel  
6 plot for each outcome. We will follow published guidance and conduct the funnel plot inquiry  
7 only for outcomes with 10 or more trials<sup>27</sup>.  
8  
9

- 10  
11
- 12 • After considering these reasons for rating down, reviewers will judge the overall  
13 confidence in estimates of effect for each outcome as follows:  
14
  - 15 • ‘high’ quality of evidence (we are very confident that the true effect lies close to that of  
16 the estimate of the effect);  
17
  - 18 • ‘moderate’ quality of evidence (we are moderately confident in the effect estimate and  
19 the true effect is likely to be close to the estimate of the effect, but there is a possibility  
20 that it is substantially different);  
21
  - 22 • ‘low’ quality of evidence (our confidence in the effect estimate is limited and the true  
23 effect may be substantially different from the estimate of the effect); and  
24
  - 25 • ‘very low’ quality of evidence (we have very little confidence in the effect estimate and  
26 the true effect is likely to be substantially different from the estimate of effect)<sup>22</sup>.  
27  
28  
29

30  
31  
32 Again, we will follow GRADE guidance for overall confidence ratings<sup>29</sup>.  
33  
34

35  
36 For both individual domains and overall confidence, if raters disagree they will try to resolve by  
37 consensus and, if not successful, the final judgment will be made by an independent reviewer  
38 (GHG).  
39  
40

## 41 42 **Presentation of Results**

43  
44 We will present the results of our meta-analyses in an Evidence Profile that will provide a  
45 succinct, easily digestible presentation of quality of evidence and magnitude of effects<sup>30</sup>. Our  
46 Evidence Profile will be constructed to include the following elements:  
47  
48

- 49 1. A measure of the typical burden of these outcomes (e.g. control group, estimated risk; if  
50 appropriate studies are available we will use the baseline risk for population-based  
51 observational studies);  
52
- 53 2. A measure of the difference between the risks with and without intervention  
54
- 55 3. The relative magnitude of effect;  
56  
57  
58  
59  
60

- 1
- 2
- 3
- 4
- 5 4. Numbers of participants and studies addressing these outcomes;
- 6
- 7 5. A rating of the overall confidence in estimate of effect for each outcome and any reasons
- 8 for rating down the confidence
- 9
- 10

## 11 Discussion

12 The decision to continue anticoagulant treatment in patients with VTE at moderate risk of  
13 recurrence beyond the first few months is based on the patients' and treating physician's  
14 perception of the benefits and harms. The risks of recurrent VTE and bleeding associated with  
15 different lengths of vitamin K antagonist treatment have been evaluated in several studies that  
16 randomly allocated patients with venous thromboembolism to receive different lengths of  
17 treatment. These studies, subsequently summarized in systematic reviews, were modest in  
18 number and of relatively small sample size. Since these studies were completed, new trials have  
19 compared shorter and longer duration of treatment with novel anticoagulants. Since the impact  
20 of the these newer agents on both thrombosis and bleeding is similar to that of warfarin, by  
21 including these studies in a new systematic review, we will be able to increase precision and  
22 narrow confidence intervals, allowing an improved estimate of effects on thrombosis and  
23 bleeding.

24 Our protocol represents a model for systematic review methods. We have planned standard  
25 methods that yield credible results, including explicit eligibility criteria, a comprehensive search,  
26 and duplicate assessment of eligibility and risk of bias. We have also planned implementation of  
27 methods seldom (a priori hypotheses to explain possible effect modification, including  
28 specification of direction of effect) or very seldom (use of the GRADE approach to rating  
29 confidence in estimates of effect) implemented in current systematic reviews.

30 Our review presents several unique challenges. One involves the specification of the study  
31 question, and the implications of that specification. Relevant studies used two different designs:  
32 short versus longer anticoagulation in which patients in the long arm continued anticoagulation  
33 until the end of the study, and short versus fixed longer anticoagulation with continued follow-up  
34 after anticoagulation was discontinued. We have decided we are interested in the relative impact  
35 of short versus indefinite - rather than fixed longer duration - anticoagulation. This will require  
36  
37  
38  
39  
40  
41  
42  
43  
44  
45  
46  
47  
48  
49  
50  
51  
52  
53  
54  
55  
56  
57  
58  
59  
60

1  
2  
3  
4  
5 exclusion of events in the latter study design that occurred - in both short and long arms - after  
6 the end of the longer arm planned anticoagulation.  
7

8  
9 In conclusion, patients and clinicians choosing between limited and indefinite duration of  
10 anticoagulation after VTE deserve access to best estimates of effect derived from the complete  
11 current literature. Our review will provide these estimates.  
12  
13

### 14 15 **Ethics and dissemination** 16

17 For purposes of privacy and confidentiality, the systematic review will be limited to studies with  
18 de-identified data. The study will be disseminated by peer-review publication and conference  
19 presentation.  
20  
21  
22  
23  
24  
25  
26  
27  
28  
29  
30  
31  
32  
33  
34  
35  
36  
37  
38  
39  
40  
41  
42  
43  
44  
45  
46  
47  
48  
49  
50  
51  
52  
53  
54  
55  
56  
57  
58  
59  
60



### Competing interests

John Eikelboom has taken the position that anticoagulation should not be used long-term in the patient population of interest and has tested aspirin in this context. Schulman is director of an Anticoagulation Clinic. Clive Kearon led the development of American College of Chest Physicians antithrombotic guidelines addressing anticoagulants use in this population and Gordon Guyatt edited the 9th edition of these guidelines.

### Authors' contributions

LCL, GHG, JE, SS, FS, CK and EA conceived the study design. NB and IN designed the database-specific literature search strategies. GHG and LCL completed the first draft of the manuscript. All authors reviewed several drafts of the manuscript and approved the final version.

### Acknowledgements

Dr Kearon is supported by the Jack Hirsh Professorship in Thromboembolism and an Investigator Award from the Heart and Stroke Foundation of Ontario.

### List of abbreviations

Venous thromboembolism (VTE)

Randomized controlled Trials (RCTs)

Grading of Recommendations, Assessment, Development and Evaluation (GRADE)

novel oral anticoagulants (NOAC)

pulmonary embolism (PE)

deep-vein thrombosis (DVT)

vitamin K antagonists (VKA)

optimal information size (OIS)

## References

1. McManus RJ, Fitzmaurice DA, Murray E, et al. Thromboembolism. Clinical evidence 2011;**2011**.
2. Naess IA, Christiansen SC, Romundstad P, et al. Incidence and mortality of venous thrombosis: a population-based study. *Journal of thrombosis and haemostasis : JTH* 2007;**5**(4):692-9.
3. National Guideline C. Prevention and management of venous thromboembolism. A national clinical guideline. Secondary Prevention and management of venous thromboembolism. A national clinical guideline. <http://www.guideline.gov/content.aspx?id=25639>.
4. British Thoracic Society guidelines for the management of suspected acute pulmonary embolism. *Thorax* 2003;**58**(6):470-83.
5. Prandoni P, Villalta S, Bagatella P, et al. The clinical course of deep-vein thrombosis. Prospective long-term follow-up of 528 symptomatic patients. *Haematologica* 1997;**82**(4):423-8.
6. Carrier M, Le Gal G, Wells PS, et al. Systematic review: case-fatality rates of recurrent venous thromboembolism and major bleeding events among patients treated for venous thromboembolism. *Annals of internal medicine* 2010;**152**(9):578-89.
7. Prandoni P, Noventa F, Ghirarduzzi A, et al. The risk of recurrent venous thromboembolism after discontinuing anticoagulation in patients with acute proximal deep vein thrombosis or pulmonary embolism. A prospective cohort study in 1,626 patients. *Haematologica* 2007;**92**(2):199-205.
8. Rodger MA, Kahn SR, Wells PS, et al. Identifying unprovoked thromboembolism patients at low risk for recurrence who can discontinue anticoagulant therapy. *CMAJ : Canadian Medical Association journal = journal de l'Association medicale canadienne* 2008;**179**(5):417-26.
9. Kearon C, Akl EA, Comerota AJ, et al. Antithrombotic therapy for VTE disease: Antithrombotic Therapy and Prevention of Thrombosis, 9th ed: American College of Chest Physicians Evidence-Based Clinical Practice Guidelines. *Chest* 2012;**141**(2 Suppl):e419S-94S.
10. Kearon C, Iorio A, Palareti G, et al. Risk of recurrent venous thromboembolism after stopping treatment in cohort studies: recommendation for acceptable rates and standardized reporting. *Thromb Haemost* 2010;**8**:2313-5.
11. Kearon C. A conceptual framework for two phases of anticoagulant treatment of venous thromboembolism. *J Thromb Haemost* 2012;**10**:507-11.
12. East AT, Wakefield TW. What is the optimal duration of treatment for DVT? An update on evidence-based medicine of treatment for DVT. *Seminars in vascular surgery* 2010;**23**(3):182-91.
13. Holbrook A, Schulman S, Witt DM, et al. Evidence-based management of anticoagulant therapy: Antithrombotic Therapy and Prevention of Thrombosis, 9th ed: American College of Chest Physicians Evidence-Based Clinical Practice Guidelines. *Chest* 2012;**141**(2 Suppl):e152S-84S.
14. Boutitie F, Pinede L, Schulman S, et al. Influence of preceding length of anticoagulant treatment and initial presentation of venous thromboembolism on risk of recurrence after

- 1  
2  
3  
4  
5 stopping treatment: analysis of individual participants' data from seven trials. *Bmj*  
6 2011;**342**:d3036.
- 7  
8 15. van Dongen CJ, Vink R, Hutten BA, et al. The incidence of recurrent venous  
9 thromboembolism after treatment with vitamin K antagonists in relation to time since  
10 first event: a meta-analysis. *Archives of internal medicine* 2003;**163**(11):1285-93.
- 11 16. Kearon C, Kahn SR, Agnelli G, et al. Antithrombotic therapy for venous thromboembolic  
12 disease: American College of Chest Physicians Evidence-Based Clinical Practice  
13 Guidelines (8th Edition). *Chest* 2008;**133**(6 Suppl):454S-545S.
- 14 17. RG O. Evaluating coding decisions. In: Cooper H, Hedges LV (editors). *The Handbook of*  
15 *Research Synthesis*. New York (NY): Russell Sage Foundation, 1994.
- 16 18. Busse JW, Guyatt G. Modification of Cochrane Tool to assess risk of bias in randomized  
17 trials. . <http://distillercercom/resources/> 2013.
- 18 19. Akl EA, Sun X, Busse JW, et al. Specific instructions for estimating unclearly reported  
19 blinding status in randomized trials were reliable and valid. *Journal of clinical*  
20 *epidemiology* 2012;**65**(3):262-7.
- 21 20. Altman DG, Bland JM. Interaction revisited: the difference between two estimates. *BMJ*  
22 (Clinical research ed) 2003;**326**(7382):219.
- 23 21. Atkins D, Best D, Briss PA, et al. Grading quality of evidence and strength of  
24 recommendations. *BMJ (Clinical research ed)* 2004;**328**(7454):1490.
- 25 22. Guyatt GH, Oxman AD, Vist GE, et al. GRADE: an emerging consensus on rating quality of  
26 evidence and strength of recommendations. *BMJ (Clinical research ed)*  
27 2008;**336**(7650):924-6.
- 28 23. Guyatt GH, Oxman AD, Vist G, et al. GRADE guidelines: 4. Rating the quality of evidence--  
29 study limitations (risk of bias). *Journal of clinical epidemiology* 2011;**64**(4):407-15.
- 30 24. Guyatt GH, Oxman AD, Kunz R, et al. GRADE guidelines: 7. Rating the quality of  
31 evidence--inconsistency. *Journal of clinical epidemiology* 2011;**64**(12):1294-302.
- 32 25. Guyatt GH, Oxman AD, Kunz R, et al. GRADE guidelines: 8. Rating the quality of  
33 evidence--indirectness. *Journal of clinical epidemiology* 2011;**64**(12):1303-10.
- 34 26. Guyatt GH, Oxman AD, Kunz R, et al. GRADE guidelines 6. Rating the quality of evidence--  
35 imprecision. *Journal of clinical epidemiology* 2011;**64**(12):1283-93.
- 36 27. Guyatt GH, Oxman AD, Montori V, et al. GRADE guidelines: 5. Rating the quality of  
37 evidence--publication bias. *Journal of clinical epidemiology* 2011;**64**(12):1277-82.
- 38 28. Akl EA, Johnston BC, Alonso-Coello P, et al. Addressing dichotomous data for participants  
39 excluded from trial analysis: a guide for systematic reviewers. *PloS one*  
40 2013;**8**(2):e57132.
- 41 29. Guyatt G, Oxman AD, Sultan S, et al. GRADE guidelines: 11. Making an overall rating of  
42 confidence in effect estimates for a single outcome and for all outcomes. *Journal of*  
43 *clinical epidemiology* 2013;**66**(2):151-7.
- 44 30. Guyatt GH, Oxman AD, Santesso N, et al. GRADE guidelines: 12. Preparing summary of  
45 findings tables-binary outcomes. *Journal of clinical epidemiology* 2013;**66**(2):158-72.
- 46  
47  
48  
49  
50  
51  
52  
53  
54  
55  
56  
57  
58  
59  
60

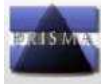

# PRISMA 2009 Checklist

1  
2  
3  
4  
5  
6  
7  
8  
9  
10  
11  
12  
13  
14  
15  
16  
17  
18  
19  
20  
21  
22  
23  
24  
25  
26  
27  
28  
29  
30  
31  
32  
33  
34  
35  
36  
37  
38  
39  
40  
41  
42  
43  
44  
45  
46  
47  
48  
49

| Section/topic                      | #  | Checklist item                                                                                                                                                                                                                                                                                              | Reported on page # |
|------------------------------------|----|-------------------------------------------------------------------------------------------------------------------------------------------------------------------------------------------------------------------------------------------------------------------------------------------------------------|--------------------|
| <b>TITLE</b>                       |    |                                                                                                                                                                                                                                                                                                             |                    |
| Title                              | 1  | Identify the report as a systematic review, meta-analysis, or both.                                                                                                                                                                                                                                         | 1                  |
| <b>ABSTRACT</b>                    |    |                                                                                                                                                                                                                                                                                                             |                    |
| Structured summary                 | 2  | Provide a structured summary including, as applicable: background; objectives; data sources; study eligibility criteria, participants, and interventions; study appraisal and synthesis methods; results; limitations; conclusions and implications of key findings; systematic review registration number. | 2                  |
| <b>INTRODUCTION</b>                |    |                                                                                                                                                                                                                                                                                                             |                    |
| Rationale                          | 3  | Describe the rationale for the review in the context of what is already known.                                                                                                                                                                                                                              | 4,5                |
| Objectives                         | 4  | Provide an explicit statement of questions being addressed with reference to participants, interventions, comparisons, outcomes, and study design (PICOS).                                                                                                                                                  | 5                  |
| <b>METHODS</b>                     |    |                                                                                                                                                                                                                                                                                                             |                    |
| Protocol and registration          | 5  | Indicate if a review protocol exists, if and where it can be accessed (e.g., Web address), and, if available, provide registration information including registration number.                                                                                                                               | 5                  |
| Eligibility criteria               | 6  | Specify study characteristics (e.g., PICOS, length of follow-up) and report characteristics (e.g., years considered, language, publication status) used as criteria for eligibility, giving rationale.                                                                                                      | 6                  |
| Information sources                | 7  | Describe all information sources (e.g., databases with dates of coverage, contact with study authors to identify additional studies) in the search and date last searched.                                                                                                                                  | 7                  |
| Search                             | 8  | Present full electronic search strategy for at least one database, including any limits used, such that it could be repeated.                                                                                                                                                                               | 7                  |
| Study selection                    | 9  | State the process for selecting studies (i.e., screening, eligibility, included in systematic review, and, if applicable, included in the meta-analysis).                                                                                                                                                   | 8                  |
| Data collection process            | 10 | Describe method of data extraction from reports (e.g., piloted forms, independently, in duplicate) and any processes for obtaining and confirming data from investigators.                                                                                                                                  | 8                  |
| Data items                         | 11 | List and define all variables for which data were sought (e.g., PICOS, funding sources) and any assumptions and simplifications made.                                                                                                                                                                       | 8                  |
| Risk of bias in individual studies | 12 | Describe methods used for assessing risk of bias of individual studies (including specification of whether this was done at the study or outcome level), and how this information is to be used in any data synthesis.                                                                                      | 9                  |
| Summary measures                   | 13 | State the principal summary measures (e.g., risk ratio, difference in means).                                                                                                                                                                                                                               | 9                  |
| Synthesis of results               | 14 | Describe the methods of handling data and combining results of studies, if done, including measures of consistency (e.g., $I^2$ for each meta-analysis).                                                                                                                                                    | 12, 13             |

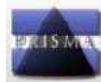

## PRISMA 2009 Checklist

Page 1 of 2

| Section/topic                 | #  | Checklist item                                                                                                                                                                                           | Reported on page # |
|-------------------------------|----|----------------------------------------------------------------------------------------------------------------------------------------------------------------------------------------------------------|--------------------|
| Risk of bias across studies   | 15 | Specify any assessment of risk of bias that may affect the cumulative evidence (e.g., publication bias, selective reporting within studies).                                                             | 9                  |
| Additional analyses           | 16 | Describe methods of additional analyses (e.g., sensitivity or subgroup analyses, meta-regression), if done, indicating which were pre-specified.                                                         | 10, 11, 12         |
| <b>RESULTS</b>                |    |                                                                                                                                                                                                          |                    |
| Study selection               | 17 | Give numbers of studies screened, assessed for eligibility, and included in the review, with reasons for exclusions at each stage, ideally with a flow diagram.                                          | --                 |
| Study characteristics         | 18 | For each study, present characteristics for which data were extracted (e.g., study size, PICOS, follow-up period) and provide the citations.                                                             | ---                |
| Risk of bias within studies   | 19 | Present data on risk of bias of each study and, if available, any outcome level assessment (see item 12).                                                                                                | --                 |
| Results of individual studies | 20 | For all outcomes considered (benefits or harms), present, for each study: (a) simple summary data for each intervention group (b) effect estimates and confidence intervals, ideally with a forest plot. | --                 |
| Synthesis of results          | 21 | Present results of each meta-analysis done, including confidence intervals and measures of consistency.                                                                                                  | --                 |
| Risk of bias across studies   | 22 | Present results of any assessment of risk of bias across studies (see Item 15).                                                                                                                          | --                 |
| Additional analysis           | 23 | Give results of additional analyses, if done (e.g., sensitivity or subgroup analyses, meta-regression [see Item 16]).                                                                                    | --                 |
| <b>DISCUSSION</b>             |    |                                                                                                                                                                                                          |                    |
| Summary of evidence           | 24 | Summarize the main findings including the strength of evidence for each main outcome; consider their relevance to key groups (e.g., healthcare providers, users, and policy makers).                     | --                 |
| Limitations                   | 25 | Discuss limitations at study and outcome level (e.g., risk of bias), and at review-level (e.g., incomplete retrieval of identified research, reporting bias).                                            | --                 |
| Conclusions                   | 26 | Provide a general interpretation of the results in the context of other evidence, and implications for future research.                                                                                  | --                 |
| <b>FUNDING</b>                |    |                                                                                                                                                                                                          |                    |
| Funding                       | 27 | Describe sources of funding for the systematic review and other support (e.g., supply of data); role of funders for the systematic review.                                                               | 1, 14              |

From: Moher D, Liberati A, Tetzlaff J, Altman DG, The PRISMA Group (2009). Preferred Reporting Items for Systematic Reviews and Meta-Analyses: The PRISMA Statement. PLoS Med 6(6): e1000097. doi:10.1371/journal.pmed1000097

For more information, visit: [www.prisma-statement.org](http://www.prisma-statement.org).

Page 2 of 2  
For peer review only - <http://bmjopen.bmj.com/site/about/guidelines.xhtml>

1  
2  
3 Database: Ovid MEDLINE(R) In-Process & Other Non-Indexed Citations, Ovid MEDLINE(R) Daily  
4 and Ovid MEDLINE(R) <1946 to Present>

5 Search Strategy:  
6  
7  
8  
9

- 10 1 exp Coumarins/  
11 2 (coumarin\$ or chromonar or coumestrol or esculin or isocoumarin\$ or psoralen? or  
12 pyranocoumarin\* or umbelliferone\*).mp.  
13 3 warfarin.mp. or Warfarin/ or warfant.mp.  
14 4 (coumadine or warfant or coumadin or marevan or aldocumar or tedicumar).mp.  
15 5 Acenocoumarol/ or acenocoumarol\*.mp.  
16 6 (Pradaxa or Dabigatran).mp.  
17 7 (Rivaroxaban or Xarelto).mp.  
18 8 ((vitamin k adj3 antagonis\*) or antivitamin K).mp.  
19 9 vitamin k/ai  
20 10 (vk adj2 antagonis\*).mp.  
21 11 (endosaban or apixaban).mp.  
22 12 BAY 59-7939.mp.  
23 13 (BMS-562247 or edoxaban or DU-176b or betrixaban).mp.  
24 14 YM150.mp.  
25 15 TAK-442.mp.  
26 16 LY517717.mp.  
27 17 PD0348292.mp.  
28 18 (VKA or VKAs).mp.  
29 19 (NOACs or noac).mp.  
30 20 (DOACs or doac).mp.  
31 21 ((new or novel or direct) adj4 (oral anticoag\* or oral anti coag\*)).mp.  
32 22 ((novel or new) adj2 (anticoag: or anti coag:)).mp.  
33 23 or/1-22  
34 24 thrombosis.mp. or exp Thrombosis/  
35 25 exp Venous Thromboembolism/ or exp Thromboembolism/ or Thromboembolism\*.mp.  
36 26 (pulmonary adj3 embolism\*).mp. or exp Pulmonary Embolism/ or (lung adj3 embolism\*).mp.  
37 27 (PE or DVT or VTE).mp.  
38 28 ((vein\* or ven\*) adj2 thromb\*).mp.  
39 29 (thrombu\* or thrombotic\* or thrombolic\* or thromboemb\* or thrombo\* or embol\*).mp.  
40 30 or/24-29  
41 31 randomized controlled trial.pt.  
42 32 random allocation/  
43  
44  
45  
46  
47  
48  
49  
50  
51  
52  
53  
54  
55  
56  
57  
58  
59  
60

1  
2  
3  
4  
5  
6  
7  
8  
9  
10  
11  
12  
13  
14  
15  
16  
17  
18  
19  
20  
21  
22  
23  
24  
25  
26  
27  
28  
29  
30  
31  
32  
33  
34  
35  
36  
37  
38  
39  
40  
41  
42  
43  
44  
45  
46  
47  
48  
49  
50  
51  
52  
53  
54  
55  
56  
57  
58  
59  
60

- 33 double-blind method/
- 34 single-blind method/
- 35 randomi?ed controlled trial\$.mp.
- 36 Randomi?ed clinical trial\$.mp.
- 37 controlled clinical trial.pt.
- 38 ((singl\$ or double\$ or trebl\$ or tripl\$) adj25 (blind\$ or mask\$)).mp.
- 39 random\$.mp.
- 40 placebo\$.mp.
- 41 cross-over studies.sh.
- 42 latin square:.tw.
- 43 or/31-42
- 44 animals/ not humans/
- 45 43 not 44
- 46 23 and 30 and 45
- 47 (2008\* or 2009\* or 2010\* or 2011\* or 2012\* or 2013\* or 2014\*).em,ed,dc.
- 48 46 and 47

\*\*\*\*\*



# BMJ Open

## Shorter or longer anticoagulation to prevent recurrent venous thromboembolism: systematic review and meta-analysis - Protocol

|                                 |                                                                                                                                                                                                                                                                                                                                                                                                                                                                                                                                                                                                                                                                                                                                                                     |
|---------------------------------|---------------------------------------------------------------------------------------------------------------------------------------------------------------------------------------------------------------------------------------------------------------------------------------------------------------------------------------------------------------------------------------------------------------------------------------------------------------------------------------------------------------------------------------------------------------------------------------------------------------------------------------------------------------------------------------------------------------------------------------------------------------------|
| Journal:                        | <i>BMJ Open</i>                                                                                                                                                                                                                                                                                                                                                                                                                                                                                                                                                                                                                                                                                                                                                     |
| Manuscript ID:                  | bmjopen-2014-005674.R1                                                                                                                                                                                                                                                                                                                                                                                                                                                                                                                                                                                                                                                                                                                                              |
| Article Type:                   | Protocol                                                                                                                                                                                                                                                                                                                                                                                                                                                                                                                                                                                                                                                                                                                                                            |
| Date Submitted by the Author:   | 17-Jun-2014                                                                                                                                                                                                                                                                                                                                                                                                                                                                                                                                                                                                                                                                                                                                                         |
| Complete List of Authors:       | Lopes, Luciane; UNISO, Pharmacie Science<br>Eikelboom, John; McMaster University, Department of Medicine, Division of Hematology and Thromboembolism<br>Spencer, Frederick; McMaster University, Medicine<br>Akl, Elie; McMaster University, Department of Clinical Epidemiology and Biostatistics; American University of Beirut, Department of Internal Medicine<br>Kearon, Clive; McMaster University<br>Neumann, Ignacio; McMaster University, Department of Clinical Epidemiology and Biostatistics<br>Schulman, Sam; McMaster University, Department of Medicine, Division of Hematology and Thromboembolism<br>Bhatnaga, Neera; McMaster University, Health Sciences Library<br>Guyatt, Gordon; McMaster University, Clinical Epidemiology and Biostatistics |
| <b>Primary Subject Heading</b>: | Cardiovascular medicine                                                                                                                                                                                                                                                                                                                                                                                                                                                                                                                                                                                                                                                                                                                                             |
| Secondary Subject Heading:      | Epidemiology, Evidence based practice                                                                                                                                                                                                                                                                                                                                                                                                                                                                                                                                                                                                                                                                                                                               |
| Keywords:                       | VASCULAR MEDICINE, Cardiology < INTERNAL MEDICINE, Anticoagulation < HAEMATOLOGY, Thromboembolism < CARDIOLOGY                                                                                                                                                                                                                                                                                                                                                                                                                                                                                                                                                                                                                                                      |
|                                 |                                                                                                                                                                                                                                                                                                                                                                                                                                                                                                                                                                                                                                                                                                                                                                     |

SCHOLARONE™  
Manuscripts

1  
2  
3  
4  
5 **Shorter or longer anticoagulation to prevent recurrent venous**  
6 **thromboembolism: systematic review and meta-analysis - Protocol**  
7  
8  
9

10 *Authors:*  
11

12  
13 **Luciane Cruz Lopes, PHD – Corresponding Author**

14 *Pharmaceutical Sciences Post graduate Course, University of Sorocaba, UNISO, Brazil.*

15 [luslopes@terra.com.br](mailto:luslopes@terra.com.br)  
16

17 **John Eikelboom**

18 *Department of Medicine, Division of Hematology and Thromboembolism, McMaster University,*  
19 *Hamilton, Ontario, Canada. [eikelbj@mcmaster.ca](mailto:eikelbj@mcmaster.ca)*

20 **Frederick A Spencer, MD**

21 *Department of Medicine, Division of Cardiology, McMaster University, Hamilton, Ontario,*  
22 *Canada. [fspence@mcmaster.ca](mailto:fspence@mcmaster.ca)*

23 **Elie A Akl**

24 *Department of Internal Medicine, American University of Beirut, Beirut, Lebanon. Department*  
25 *of Clinical Epidemiology and Biostatistics, McMaster University, Hamilton, Ontario, Canada*

26 *Department of Medicine, State University of New York at Buffalo, Buffalo, New York, USA*

27 [ea32@aub.edu.lb](mailto:ea32@aub.edu.lb)  
28

29 **Clive Kearon MB, PhD**

30 *Department of Medicine, Division of Hematology and Thromboembolism, McMaster University,*  
31 *Hamilton, Ontario, Canada [kearonc@mcmaster.ca](mailto:kearonc@mcmaster.ca)*

32 **Ignacio Neumann, MD, MSc,**

33 *Department of Clinical Epidemiology and Biostatistics, McMaster University, Hamilton,*  
34 *Canada AND Department of Internal Medicine, School of Medicine, Pontificia Universidad*  
35 *Catolica de Chile, Santiago, Chile.*

36 [ignacio.neumann@gmail.com](mailto:ignacio.neumann@gmail.com)  
37

38 **Sam Schulman, MD, PHD**

39 *Department of Medicine, Division of Hematology and Thromboembolism, McMaster University,*  
40 *Hamilton, Ontario, Canada. [schulms@mcmaster.ca](mailto:schulms@mcmaster.ca)*

41 **Neera Bhatnaga**

42 *Health Sciences Library McMaster University, Hamilton, Ontario, Canada.*

43 [bhatnag@mcmaster.ca](mailto:bhatnag@mcmaster.ca)  
44

45 **Gordon Guyatt, MD**

46 *Department of Clinical Epidemiology and Biostatistics, McMaster University, Hamilton,*  
47 *Ontario, Canada. [guyatt@mcmaster.ca](mailto:guyatt@mcmaster.ca)*  
48  
49  
50  
51  
52  
53  
54  
55  
56  
57  
58  
59  
60

## Abstract

**Introduction:** Venous thromboembolism (VTE) is a major disease associated with both short term and long-term morbidity and mortality. Patients with a VTE provoked by surgery or immobilization are at low risk of recurrence and do not require long term anticoagulation; those with a VTE and metastatic cancer are at high risk of recurrence and require lifetime thromboprophylaxis. In those at intermediate risk of recurrence, it remains controversial whether prolonging anticoagulation and thus incurring treatment burden and bleeding risk is warranted.

**Methods and Analysis:** We will conduct a systematic review and meta-analysis of RCTs enrolling patients with VTE at intermediate risk of recurrence and evaluating short term anticoagulation (12 weeks to 9 months initial therapy) *versus* longer term anticoagulation (at least 6 months additional anticoagulation beyond the course of treatment in the shorter arm). Anticoagulation could consist of vitamin K antagonists or new oral anticoagulants. Outcomes of interest include recurrent non-fatal thrombosis (deep venous thrombosis and pulmonary embolism), major non-fatal bleeding and mortality. We will systematically search CINAHL, EMBASE, MEDLINE and the Cochrane Central Registry of Controlled Trials. Teams of two reviewers will, independently and in duplicate, screen titles and abstracts and complete full text reviews to determine eligibility, and subsequently abstract data and assess risk of bias in eligible trials. We will conduct meta-analyses to establish the effect of short-term versus long-term anticoagulation on the outcomes of interest and evaluate confidence in estimates (quality of evidence) using the GRADE approach.

**Ethics and dissemination:** Our review will facilitate evidence-based management of patients with unprovoked or recurrent VTE. For purposes of privacy and confidentiality, the systematic review will be limited to studies with de-identified data. The study will be disseminated by peer-review publication and conference presentation.

**Registration:** PROSPERO (CRD42014007620)

**Keywords:** VTE. Duration. Vitamin K antagonist. NOAC. RCT. Meta-analysis

## ARTICLE FOCUS:

In patients who have suffered a venous thromboembolic event (VTE – deep venous thrombosis or pulmonary embolus) at intermediate risk of recurrence (unprovoked or recurrent VTE but not cancer) what is the relative impact of anticoagulation for 3 to 9 months versus indefinite anticoagulation.

## KEY MESSAGE:

We will conduct a systematic review and meta-analysis of RCTs enrolling patients with VTE at intermediate risk of recurrence and evaluating short term anticoagulation (3 to 9 months initial therapy) versus longer term anticoagulation (at least 6 months additional anticoagulation beyond the course of treatment in the shorter arm). Anticoagulation could consist of vitamin K antagonists or new oral anticoagulants. Outcomes of interest will include recurrent non-fatal thrombosis (deep venous thrombosis and pulmonary embolism), major non-fatal bleeding and mortality

## STRENGTHS AND LIMITATIONS OF THIS STUDY

The methods of the review are state-of-art, including explicit eligibility criteria, a comprehensive search, independent duplicate assessment of eligibility, and use of the GRADE approach to assessing confidence in estimates of effect including independent duplicate assessment of risk of bias, precision, consistency, directness and publication bias. Our protocol represents a model for systematic review methods. Our results are likely to be limited by limitations in the primary studies.

## Introduction

Venous thromboembolism (VTE), which comprises deep-vein thrombosis (DVT) and pulmonary embolism (PE), is a major disease that results in considerable morbidity and mortality. Deep venous thrombosis or pulmonary embolism may occur in almost 2 in 1000 people each year and between 5% and 15% of people with untreated DVT may die from pulmonary embolism<sup>1 2</sup>. Thrombosis most commonly affects the deep veins of the lower limbs, but may affect other sites, including the upper limbs. Complications include pulmonary thromboembolism and post-thrombotic syndrome (PTS)<sup>3</sup>.

Risk factors for VTE include immobility, surgery (particularly orthopedic), malignancy, pregnancy, older age, estrogen therapy, and inherited or acquired prothrombotic clotting disorders<sup>4</sup>. In many patients, DVT remains asymptomatic and resolves without complications.. DVTs of concern are those that become symptomatic and are responsible for morbidity and mortality<sup>3</sup>. Patients with extensive proximal DVT have a substantial risk of developing the post-thrombotic syndrome, particularly if there is an ipsilateral recurrence with further valve destruction<sup>5</sup>. The average rate of fatal recurrent VTE after anticoagulation is discontinued has been estimated at 0.3 per 100 patient-years<sup>6</sup>. Based on observational data<sup>7 8</sup>, authors of the ninth iteration of the American College of Chest Physicians antithrombotic guidelines<sup>9</sup> estimated that in patients with unprovoked proximal DVT or PE the risk of recurrence in the first year after discontinuation of anticoagulation is 10% with a risk of 5% per year thereafter (i.e. 30% at 5 years).

A consensus exists regarding the need for anticoagulant treatment, usually with vitamin K antagonists (VKA) or with novel oral anticoagulants (NOAC) for patients with venous thromboembolism. Whereas clinicians agree on the need for 3 to 6 months of anticoagulation after the diagnosis of venous thromboembolism (VTE), opinions regarding optimal duration of secondary prophylaxis differ. Although the prevention of recurrence is certainly desirable, the risk of major bleeding, together with the burden of therapy and cost, makes long-term treatment potentially problematic.

1  
2  
3  
4  
5 The risk-to-benefit ratio is highly dependent of the risk of recurrence of VTE which differs  
6 according to the presence or absence of reversible predisposing factors, location of the  
7 thrombosis, patient age, the presence of comorbid conditions, and intrinsic predispositions to  
8 thrombosis (inherited and acquired thrombophilia disorders). Guidelines suggest that the risk of  
9 recurrence is sufficiently low after a DVT provoked by temporary immobilization or lower limb  
10 fracture that treatment beyond 6 months is not in these patients' best interest. Further, there is  
11 agreement that lifelong anticoagulation is warranted patients at highest risk of recurrence (i.e.,  
12 patients with active metastatic cancer). The controversy regarding treatment beyond 6 months is  
13 restricted to those with intermediate risk<sup>10 11</sup>. These patients include those whose VTE was  
14 unprovoked or whose VTE, if provoked, has happened more than once (recurrent VTE).  
15  
16  
17  
18  
19  
20  
21  
22  
23

24 To make optimal decisions, patients and clinicians need best evidence estimates of benefits and  
25 harms of short versus long-term anticoagulation. In the trials included in previous systematic  
26 reviews of this topic the anticoagulants administered were Vitamin K antagonists<sup>12-15</sup>. Recent  
27 randomized trials have evaluated longer and shorter administration of NOACs. Therefore, we  
28 will update a systematic review and meta-analysis of the relative benefits and harms of longer  
29 versus shorter periods of anticoagulation in patients at intermediate risk of recurrence. Our  
30 primary question will be the impact of indefinite anticoagulation versus discontinuing  
31 anticoagulation after 3 to 9 months on the outcomes of interest. By indefinite anticoagulation we  
32 mean continuing anticoagulation until changes in circumstances would mandate a  
33 discontinuation. For many such patients, we would anticipate lifetime anticoagulation.  
34  
35  
36  
37  
38  
39  
40  
41  
42

## 43 *Methods/design*

### 44 **Protocol and registration**

45  
46 Our protocol is registered on PROSPERO (CRD42014007620), <http://www.crd.york.ac.uk/PROSPERO>.  
47  
48  
49

### 50 **Issues in defining trial eligibility**

51  
52 Trials investigating the effect of prolonged anticoagulation on the risk of VTE recurrence vary in  
53 terms of the duration of anticoagulation in the shorter and longer duration arms. They also differ  
54 in the nature of populations enrolled. These differences create challenges in defining study  
55 eligibility criteria.  
56  
57  
58  
59  
60

1  
2  
3  
4  
5 In defining eligibility criteria any systematic review faces tension between broad eligibility  
6 criteria, which enhance precision of effect estimates and generalizability of results, and narrow  
7 criteria, which decrease the risks of heterogeneity and of generating pooled estimates that are not  
8 applicable to the range of patients and interventions included. A reasonable strategy for dealing  
9 with this tension, which we will adopt, is to choose relatively broad but clinically plausible  
10 criteria and then explore possible sources of heterogeneity. Therefore, although standard shorter-  
11 term anticoagulation is up to 6 months, we are including trials in which the shorter-term arm  
12 received anticoagulation up to 9 months. For the longer-term arm, we will accept any trial in  
13 which the duration of treatment is at least six months longer than in the shorter-term arm. We  
14 will conduct subgroup analyses focusing on the duration of therapy in both the shorter and  
15 longer-term arms.  
16  
17  
18  
19  
20  
21  
22  
23  
24

25 As we described in the background, the controversy regarding duration of anticoagulation is  
26 focused on patients in the intermediate risk category. Typically, these are patients with  
27 unprovoked VTE or recurrent VTE (provoked and unprovoked), but definitions might differ  
28 across trials. Thus, ideally, all patients included in the trials would fall into these risk groups. It  
29 would be inappropriate, however, to exclude trials in which most but not all patients fit this  
30 description. We will include any study in which, according to the definition used in the study at  
31 least 50% of patients fall into one of these risk groups. If there is appreciable heterogeneity in  
32 the proportion of patients in these risk categories we will conduct subgroup analyses based on  
33 this variability.  
34  
35  
36  
37  
38  
39  
40  
41  
42

### 43 Eligibility criteria

#### 44 Inclusion

45 **Patients:** Studies must include patients with DVT and/or PE in whom at least 50% have a first  
46 unprovoked (no apparent clinical risk factor<sup>16</sup> VTE, or a second or subsequent VTE (can be  
47 provoked or unprovoked) in the absence of cancer.  
48  
49  
50  
51  
52

53 **Intervention shorter duration treatment:** Studies must include an arm in which patients are  
54 anticoagulated with either vitamin K antagonists or novel anticoagulants for at least 12 weeks,  
55 but no longer than 9 months.  
56  
57  
58  
59  
60



1  
2  
3  
4  
5 **Intervention longer duration of treatment:** Studies must include an arm in which patients are  
6 anticoagulated with either vitamin K antagonists or novel anticoagulants for at least six months  
7 longer than in the shorter duration treatment arm.  
8  
9

10  
11 **Outcomes:** Trials must report on at least one of the following outcomes: recurrent VTE, DVT,  
12 fatal and non-fatal pulmonary embolus confirmed by objective testing (for DVT, venography or  
13 ultrasonography; for PE radiological imaging including ventilation/perfusion scanning, CT  
14 pulmonary angiography, MRI, conventional angiography, or autopsy), fatal and non-fatal  
15 serious/important bleeding episodes, post thrombotic syndrome, quality of life and total  
16 mortality.  
17  
18  
19  
20  
21

22  
23 **Type of study and design:** We will include only randomized controlled trials (RCT). We will  
24 include two types of RCT designs. In one design, patients, at the outset of VTE, are randomized  
25 to shorter or longer anticoagulation. In the alternative design all patients undergo the short-  
26 course anticoagulation regimen. They are then randomized to stop anticoagulation or to a further  
27 period of anticoagulation. We will include studies in which patients undergo shorter-term  
28 treatment with an anticoagulant, most often VKA, and then receive a new anticoagulant versus  
29 placebo.  
30  
31  
32  
33  
34  
35

### 36 **Exclusion:**

37 We will exclude studies enrolling only pure populations of high-risk patients, such as those with  
38 protein S or C deficiency or anti-phospholipid antibody or antiphospholipid antibody syndrome.  
39  
40  
41

### 42 **Information sources and search**

43 We will screen all RCTs reviewed in the 9th iteration of the American College of Chest  
44 Physicians antithrombotic guidelines and then will conduct additional search from January 2011  
45 forward, six months prior (to account for lag in indexing) to the date the comprehensive search  
46 on the topic for the 9<sup>th</sup> iteration ACCP antithrombotic guidelines. We will search OVID Medline,  
47 EMBASE, Cochrane Central Registry of Controlled Trials (CENTRAL) and CINAHL with no  
48 language restriction. An experienced librarian (NB) developed a sensitive search strategy for this  
49 (see Appendix 1). We will scan the bibliographies of all systematic reviews and meta-analyses as  
50 well as all eligible primary studies for additional relevant articles.  
51  
52  
53  
54  
55  
56  
57  
58  
59  
60

## Study selection

Following a calibration exercise, reviewers will work in pairs to screen, independently and in duplicate, titles and available abstracts of identified citations. We will acquire the full text publication of any article that either reviewer judges as potentially eligible. The same reviewer teams will, following a second calibration exercise, independently apply eligibility criteria to the full text of potentially eligible trials using standardized forms. They will resolve disagreements by consensus or, if a discrepancy remains, through discussion with an arbitrator (GHG). We will measure inter-rater agreement for full text eligibility and assessment of risk of bias using the Kappa statistics. Values of kappa between 0.40 and 0.59 have been considered to reflect fair agreement, between 0.60 and 0.74 to reflect good agreement and 0.75 or more to reflect excellent agreement<sup>17</sup>.

## Data collection process and data items

Using pilot tested standardized forms and following a calibration exercise, teams of two reviewers will extract data independently and in duplicate from each eligible study. Data abstracted will include details on the study methodology, participants, intervention, control, and all reported patient-important outcomes. For each outcome, we will record number of patients enrolled in each study arm, and the number of patients for whom final follow-up data is available, and the number of events in each study group.

Reviewers will resolve disagreements by discussion, and one arbitrator (GHG) will adjudicate unresolved disagreements. We will contact the authors of each study to clarify any issues of uncertainty in the data abstraction and to ensure that our abstraction is correct.

Reviewers will independently extract details of the anticoagulation regimens in both the shorter and longer duration arms. Outcomes will include death; cause-specific mortality (PE or bleeding); recurrent non-fatal VTE (DVT and pulmonary embolus) and non-fatal serious/important bleeding. We will document definitions of serious/important bleeding in each study.

### Risk of bias in individual studies

Reviewers will assess risk of bias within each study with a modified Cochrane risk of bias instrument<sup>18</sup> which assesses the following key domains: randomization sequence generation; allocation concealment; blinding of participants, healthcare professionals, outcome assessors, data collectors, and data analysts; incomplete outcome data; selective outcome reporting; and other sources of bias which will include differential intensity of surveillance for VTE and bleeding in the short and long arms, and premature cessation of follow-up (for instance, no follow-up for bleeding in the short arm after a VTE and resumption of anticoagulation). We will consider as a criterion of risk of bias whether the investigators specify a total surveillance period equal in length for the longer and shorter arms (i.e., same follow-up period from the time of randomization) versus a total surveillance period that is different (e.g., same follow-up period from the time of stopping anticoagulation) or not specified. Reviewers will input response options of ‘definitely yes’, ‘probably yes’, ‘probably no’, and ‘definitely no’ for each of the domains, with ‘definitely yes’ and ‘probably yes’ ultimately assigned low risk of bias and ‘definitely no’ and ‘probably no’ assigned high risk of bias<sup>19</sup>. Reviewers will resolve disagreements by discussion, and one arbitrator (GHG) will adjudicate unresolved disagreements.

### Meta-analysis and data synthesis

Data regarding VTE, serious/important bleeding, mortality and person-time at risk will be extracted by 2 independent reviewers using a standardized form, with adjudication by a third reviewer in cases of disagreement. Given our primary interest in short term versus indefinite anticoagulation, in studies with follow-up after discontinuation of anticoagulation in the long arm, we will try to identify events that occurred in either arm after the scheduled discontinuation of anticoagulation in the long arm. We will exclude such events in the primary analysis.

For each study, incidence rates in events per person-year at risk will be calculated for the outcomes of recurrent VTE and serious/important bleeding. We have chosen events per person-years rather than number of people with events to account for differential length of follow-up within individual studies and across studies, and the possibility of multiple events in a single

1  
2  
3  
4  
5 individual. When investigators do not report person-time data (either directly or indirectly  
6 through a Kaplan-Meier survival curve), the person-time of the interval will be estimated by  
7 multiplying the number of participants present at the beginning of the interval by the duration of  
8 the interval and subtracting person-time for events occurring within the interval. For this  
9 calculation we will assume that events will be equally likely throughout the interval unless data  
10 to the contrary are in the report.  
11

12 Our estimates of study heterogeneity will be informed using the p-value for  $\text{Chi}^2$  for  
13 heterogeneity, and the  $I^2$  statistic where 0-40% may be unimportant heterogeneity, 30-60%  
14 moderate, 50-90% substantial and 75-100% considerable heterogeneity<sup>44</sup>. We will explore  
15 heterogeneity by conducting the five a priori subgroup analyses using a z-test to test for  
16 interaction<sup>20</sup>.  
17  
18  
19  
20  
21  
22  
23  
24  
25

### 26 **Assessment of heterogeneity and subgroup analyses**

27  
28 We will explore heterogeneity using sub-group hypotheses, which apply to bleeding and VTE  
29 outcomes and mortality and are framed as effects in longer versus shorter duration  
30 anticoagulation. We postulate that larger reductions in thrombosis, and larger increases in  
31 bleeding, will occur in the following situations: i) when the shorter duration anticoagulation arm  
32 is three months or less versus longer than 3 months; ii) when the longer duration anticoagulation  
33 arm is more than 12 months longer than the shorter duration arm versus 12 months or less;; iii)  
34 studies in which the number of risk of bias domains judged as 'high risk' is greater than the  
35 median will have larger effects than studies in which that number is less than the median. iv)  
36 when therapy is a NOAC versus warfarin with target INR 2.0 or greater) versus warfarin lower  
37 boundary of target INR less than 2.0); v) when anticoagulation was continued until the end of the  
38 study or in which we can exclude events that occurred in either arm after timing of cessation of  
39 anticoagulation in the long arm versus follow-up continued after anticoagulant stopped and not  
40 possible to identify and exclude events that occurred after cessation of anticoagulation in the  
41 long arm.  
42  
43  
44  
45  
46  
47  
48  
49  
50  
51  
52  
53  
54  
55

### 56 **Confidence in pooled estimates of effect**

57  
58  
59  
60

1  
2  
3  
4  
5 Two reviewers will, independently and in duplicate, assess the confidence in effect estimates for  
6 each outcome using the GRADE (Grading of Recommendations, Assessment, Development and  
7 Evaluation) rating system<sup>21</sup>. In the GRADE system of rating quality of evidence for each  
8 outcome, randomized trials begin as high quality evidence, but may be rated down by one or  
9 more of five categories of limitations<sup>22</sup>. The GRADE working group has provided detailed  
10 guidance regarding judgments for each of these criteria: (1) risk of bias<sup>23</sup>, (2) inconsistency<sup>24</sup>, (3)  
11 indirectness<sup>25</sup>, (4) imprecision<sup>26</sup>, and (5) publication bias<sup>27</sup>.  
12  
13  
14  
15  
16  
17  
18

19 For assessing the impact of loss to follow-up across studies, we will conduct sensitivity analyses  
20 making progressively more stringent assumptions regarding loss to follow-up in intervention and  
21 control groups. The extent to which point estimates and confidence intervals differ in these  
22 sensitivity analyses will determine whether we rate down for risk of bias<sup>28</sup>.  
23  
24  
25  
26  
27

28 We anticipate that “number of patients enrolled minus number of patients for whom final follow-  
29 up is available” may include: i. unexplained losses to follow-up (lost contact), ii. explained  
30 losses to follow-up (e.g., followed until patient moved), iii. Followed until they had a recurrent  
31 VTE (or lost to follow-up for other complications such as death, or bleeding from restarted  
32 anticoagulation).  
33  
34  
35  
36

37 With respect to precision, the GRADE guidance notes that meta-analyses of small trials can  
38 provide evidence of benefit with confidence intervals that appear to convincingly exclude no  
39 effect; however, the results of reviews of such studies have often been subsequently refuted by  
40 larger trials<sup>26</sup>. To address this potential concern in cases in which our meta-analysis suggests  
41 benefit but the sample size is less than the optimal information size (OIS; the number of patients  
42 generated by a conventional sample size calculation for a single trial) we will rate down the  
43 quality for imprecision. For the purposes of calculating the OIS we will assume, for binary  
44 variables a relative risk reduction or increase (delta) of 25%, an alpha of 0.05, and a beta of 0.20,  
45 and a median baseline risk from the available studies.  
46  
47  
48  
49  
50  
51  
52  
53  
54  
55  
56  
57  
58  
59  
60

1  
2  
3  
4  
5 For each outcome we will assess publication bias by visually observing asymmetry of the funnel  
6 plot for each outcome. We will follow published guidance and conduct the funnel plot inquiry  
7 only for outcomes with 10 or more trials<sup>27</sup>.  
8  
9

- 10  
11
- 12 • After considering these reasons for rating down, reviewers will judge the overall  
13 confidence in estimates of effect for each outcome as follows:  
14
  - 15 • ‘high’ quality of evidence (we are very confident that the true effect lies close to that of  
16 the estimate of the effect);  
17
  - 18 • ‘moderate’ quality of evidence (we are moderately confident in the effect estimate and  
19 the true effect is likely to be close to the estimate of the effect, but there is a possibility  
20 that it is substantially different);  
21
  - 22 • ‘low’ quality of evidence (our confidence in the effect estimate is limited and the true  
23 effect may be substantially different from the estimate of the effect); and  
24
  - 25 • ‘very low’ quality of evidence (we have very little confidence in the effect estimate and  
26 the true effect is likely to be substantially different from the estimate of effect)<sup>22</sup>.  
27  
28  
29

30  
31 Again, we will follow GRADE guidance for overall confidence ratings<sup>29</sup>.  
32  
33

34  
35 For both individual domains and overall confidence, if raters disagree they will try to resolve by  
36 consensus and, if not successful, the final judgment will be made by an independent reviewer  
37 (GHG).  
38  
39

## 40 41 42 **Presentation of Results**

43 We will present the results of our meta-analyses in an Evidence Profile that will provide a  
44 succinct, easily digestible presentation of quality of evidence and magnitude of effects<sup>30</sup>. Our  
45 Evidence Profile will be constructed to include the following elements:  
46  
47

- 48 1. A measure of the typical burden of these outcomes (e.g. control group, estimated risk; if  
49 appropriate studies are available we will use the baseline risk for population-based  
50 observational studies);  
51
- 52 2. A measure of the difference between the risks with and without intervention  
53
- 54 3. The relative magnitude of effect;  
55  
56  
57  
58  
59  
60

- 1
- 2
- 3
- 4
- 5 4. Numbers of participants and studies addressing these outcomes;
- 6
- 7 5. A rating of the overall confidence in estimate of effect for each outcome and any reasons
- 8 for rating down the confidence
- 9

## 10 Discussion

11 The decision to continue anticoagulant treatment in patients with VTE at moderate risk of  
12 recurrence beyond the first few months is based on the patients' and treating physician's  
13 perception of the benefits and harms. The risks of recurrent VTE and bleeding associated with  
14 different lengths of vitamin K antagonist treatment have been evaluated in several studies that  
15 randomly allocated patients with venous thromboembolism to receive different lengths of  
16 treatment. These studies, subsequently summarized in systematic reviews, were modest in  
17 number and of relatively small sample size. Since these studies were completed, new trials have  
18 compared shorter and longer duration of treatment with novel anticoagulants. Since the impact  
19 of the these newer agents on both thrombosis and bleeding is similar to that of warfarin, by  
20 including these studies in a new systematic review, we will be able to increase precision and  
21 narrow confidence intervals, allowing an improved estimate of effects on thrombosis and  
22 bleeding.  
23

24 Our protocol represents a model for systematic review methods. We have planned standard  
25 methods that yield credible results, including explicit eligibility criteria, a comprehensive search,  
26 and duplicate assessment of eligibility and risk of bias. We have also planned implementation of  
27 methods seldom (a priori hypotheses to explain possible effect modification, including  
28 specification of direction of effect) or very seldom (use of the GRADE approach to rating  
29 confidence in estimates of effect) implemented in current systematic reviews.  
30

31 Our review presents several unique challenges. One involves the specification of the study  
32 question, and the implications of that specification. Relevant studies used two different designs:  
33 short versus longer anticoagulation in which patients in the long arm continued anticoagulation  
34 until the end of the study, and short versus fixed longer anticoagulation with continued follow-up  
35 after anticoagulation was discontinued. We have decided we are interested in the relative impact  
36 of short versus indefinite - rather than fixed longer duration - anticoagulation. This will require  
37



1  
2  
3  
4  
5 exclusion of events in the latter study design that occurred - in both short and long arms - after  
6 the end of the longer arm planned anticoagulation. Reported data may limit our ability to carry  
7 out this exclusion as would be optimal.  
8  
9

10  
11 Our study is likely to be limited by other aspects of study design and reporting of the primary  
12 studies. In particular, though we are interested in the impact of indefinite versus limited  
13 anticoagulation, studies will have limited follow-up, often 2 to 3 years. Both bleeding and event  
14 rates in the second and third years will, however, provide a useful estimate of what is liable to  
15 happen in subsequent years. Another important limitation is that we will not have access to  
16 individual patient data and therefore subgroup analysis and inferences will be limited.  
17  
18  
19  
20  
21  
22  
23  
24

25 In conclusion, patients and clinicians choosing between limited and indefinite duration of  
26 anticoagulation after VTE deserve access to best estimates of effect derived from the complete  
27 current literature. Our review will provide these estimates.  
28  
29  
30  
31  
32  
33  
34  
35  
36  
37  
38  
39  
40  
41  
42  
43  
44  
45  
46  
47  
48  
49  
50  
51  
52  
53  
54  
55  
56  
57  
58  
59  
60

## Acknowledgements

Dr Kearon is supported by the Jack Hirsh Professorship in Thromboembolism and an Investigator Award from the Heart and Stroke Foundation of Ontario.

## Competing interests

John Eikelboom has taken the position that anticoagulation should not be used long-term in the patient population of interest and has tested aspirin in this context. Schulman is director of an Anticoagulation Clinic. Clive Kearon led the development of American College of Chest Physicians antithrombotic guidelines addressing anticoagulants use in this population and Gordon Guyatt edited the 9th edition of these guidelines.

## Authors' contributions

LCL, GHG, JE, SS, FS, CK and EA conceived the study design. NB and IN designed the database-specific literature search strategies. GHG and LCL completed the first draft of the manuscript. All authors reviewed several drafts of the manuscript and approved the final version.

## List of abbreviations

Venous thromboembolism (VTE)

Randomized controlled Trials (RCTs)

Grading of Recommendations, Assessment, Development and Evaluation (GRADE)

novel oral anticoagulants (NOAC)

pulmonary embolism (PE)

deep-vein thrombosis (DVT)

vitamin K antagonists (VKA)

optimal information size (OIS)

## References

1. McManus RJ, Fitzmaurice DA, Murray E, et al. Thromboembolism. Clinical evidence 2011;**2011**.
2. Naess IA, Christiansen SC, Romundstad P, et al. Incidence and mortality of venous thrombosis: a population-based study. *Journal of thrombosis and haemostasis : JTH* 2007;**5**(4):692-9.
3. National Guideline C. Prevention and management of venous thromboembolism. A national clinical guideline. Secondary Prevention and management of venous thromboembolism. A national clinical guideline. <http://www.guideline.gov/content.aspx?id=25639>.
4. British Thoracic Society guidelines for the management of suspected acute pulmonary embolism. *Thorax* 2003;**58**(6):470-83.
5. Prandoni P, Villalta S, Bagatella P, et al. The clinical course of deep-vein thrombosis. Prospective long-term follow-up of 528 symptomatic patients. *Haematologica* 1997;**82**(4):423-8.
6. Carrier M, Le Gal G, Wells PS, et al. Systematic review: case-fatality rates of recurrent venous thromboembolism and major bleeding events among patients treated for venous thromboembolism. *Annals of internal medicine* 2010;**152**(9):578-89.
7. Prandoni P, Noventa F, Ghirarduzzi A, et al. The risk of recurrent venous thromboembolism after discontinuing anticoagulation in patients with acute proximal deep vein thrombosis or pulmonary embolism. A prospective cohort study in 1,626 patients. *Haematologica* 2007;**92**(2):199-205.
8. Rodger MA, Kahn SR, Wells PS, et al. Identifying unprovoked thromboembolism patients at low risk for recurrence who can discontinue anticoagulant therapy. *CMAJ : Canadian Medical Association journal = journal de l'Association medicale canadienne* 2008;**179**(5):417-26.
9. Kearon C, Akl EA, Comerota AJ, et al. Antithrombotic therapy for VTE disease: Antithrombotic Therapy and Prevention of Thrombosis, 9th ed: American College of Chest Physicians Evidence-Based Clinical Practice Guidelines. *Chest* 2012;**141**(2 Suppl):e419S-94S.
10. Kearon C, Iorio A, Palareti G, et al. Risk of recurrent venous thromboembolism after stopping treatment in cohort studies: recommendation for acceptable rates and standardized reporting. *Thromb Haemost* 2010;**8**:2313-5.
11. Kearon C. A conceptual framework for two phases of anticoagulant treatment of venous thromboembolism. *J Thromb Haemost* 2012;**10**:507-11.
12. East AT, Wakefield TW. What is the optimal duration of treatment for DVT? An update on evidence-based medicine of treatment for DVT. *Seminars in vascular surgery* 2010;**23**(3):182-91.
13. Holbrook A, Schulman S, Witt DM, et al. Evidence-based management of anticoagulant therapy: Antithrombotic Therapy and Prevention of Thrombosis, 9th ed: American College of Chest Physicians Evidence-Based Clinical Practice Guidelines. *Chest* 2012;**141**(2 Suppl):e152S-84S.
14. Boutitie F, Pinede L, Schulman S, et al. Influence of preceding length of anticoagulant treatment and initial presentation of venous thromboembolism on risk of recurrence after

- 1  
2  
3  
4  
5 stopping treatment: analysis of individual participants' data from seven trials. *Bmj*  
6 2011;**342**:d3036.
- 7  
8 15. van Dongen CJ, Vink R, Hutten BA, et al. The incidence of recurrent venous  
9 thromboembolism after treatment with vitamin K antagonists in relation to time since  
10 first event: a meta-analysis. *Archives of internal medicine* 2003;**163**(11):1285-93.
- 11 16. Kearon C, Kahn SR, Agnelli G, et al. Antithrombotic therapy for venous thromboembolic  
12 disease: American College of Chest Physicians Evidence-Based Clinical Practice  
13 Guidelines (8th Edition). *Chest* 2008;**133**(6 Suppl):454S-545S.
- 14 17. RG O. Evaluating coding decisions. In: Cooper H, Hedges LV (editors). *The Handbook of*  
15 *Research Synthesis*. New York (NY): Russell Sage Foundation, 1994.
- 16 18. Busse JW, Guyatt G. Modification of Cochrane Tool to assess risk of bias in randomized  
17 trials. . <http://distillercercom/resources/> 2013.
- 18 19. Akl EA, Sun X, Busse JW, et al. Specific instructions for estimating unclearly reported  
19 blinding status in randomized trials were reliable and valid. *Journal of clinical*  
20 *epidemiology* 2012;**65**(3):262-7.
- 21 20. Altman DG, Bland JM. Interaction revisited: the difference between two estimates. *BMJ*  
22 (Clinical research ed) 2003;**326**(7382):219.
- 23 21. Atkins D, Best D, Briss PA, et al. Grading quality of evidence and strength of  
24 recommendations. *BMJ (Clinical research ed)* 2004;**328**(7454):1490.
- 25 22. Guyatt GH, Oxman AD, Vist GE, et al. GRADE: an emerging consensus on rating quality of  
26 evidence and strength of recommendations. *BMJ (Clinical research ed)*  
27 2008;**336**(7650):924-6.
- 28 23. Guyatt GH, Oxman AD, Vist G, et al. GRADE guidelines: 4. Rating the quality of evidence--  
29 study limitations (risk of bias). *Journal of clinical epidemiology* 2011;**64**(4):407-15.
- 30 24. Guyatt GH, Oxman AD, Kunz R, et al. GRADE guidelines: 7. Rating the quality of  
31 evidence--inconsistency. *Journal of clinical epidemiology* 2011;**64**(12):1294-302.
- 32 25. Guyatt GH, Oxman AD, Kunz R, et al. GRADE guidelines: 8. Rating the quality of  
33 evidence--indirectness. *Journal of clinical epidemiology* 2011;**64**(12):1303-10.
- 34 26. Guyatt GH, Oxman AD, Kunz R, et al. GRADE guidelines 6. Rating the quality of evidence--  
35 imprecision. *Journal of clinical epidemiology* 2011;**64**(12):1283-93.
- 36 27. Guyatt GH, Oxman AD, Montori V, et al. GRADE guidelines: 5. Rating the quality of  
37 evidence--publication bias. *Journal of clinical epidemiology* 2011;**64**(12):1277-82.
- 38 28. Akl EA, Johnston BC, Alonso-Coello P, et al. Addressing dichotomous data for participants  
39 excluded from trial analysis: a guide for systematic reviewers. *PloS one*  
40 2013;**8**(2):e57132.
- 41 29. Guyatt G, Oxman AD, Sultan S, et al. GRADE guidelines: 11. Making an overall rating of  
42 confidence in effect estimates for a single outcome and for all outcomes. *Journal of*  
43 *clinical epidemiology* 2013;**66**(2):151-7.
- 44 30. Guyatt GH, Oxman AD, Santesso N, et al. GRADE guidelines: 12. Preparing summary of  
45 findings tables-binary outcomes. *Journal of clinical epidemiology* 2013;**66**(2):158-72.
- 46  
47  
48  
49  
50  
51  
52  
53  
54  
55  
56  
57  
58  
59  
60

1  
2  
3  
4  
5  
6  
7  
8  
9  
10  
11  
12  
13  
14  
15  
16  
17  
18  
19  
20  
21  
22  
23  
24  
25  
26  
27  
28  
29  
30  
31  
32  
33  
34  
35  
36  
37  
38  
39  
40  
41  
42  
43  
44  
45  
46  
47  
48  
49  
50  
51  
52  
53  
54  
55  
56  
57  
58  
59  
60

## Shorter or longer anticoagulation to prevent recurrent venous thromboembolism: systematic review and meta-analysis - Protocol

### Authors:

#### **Luciane Cruz Lopes, PHD – Corresponding Author**

*Pharmaceutical Sciences Post graduate Course, University of Sorocaba, UNISO, Brazil.*

[luslopes@terra.com.br](mailto:luslopes@terra.com.br)

#### **John Eikelboom**

*Department of Medicine, Division of Hematology and Thromboembolism, McMaster University, Hamilton, Ontario, Canada. [eikelbj@mcmaster.ca](mailto:eikelbj@mcmaster.ca)*

#### **Frederick A Spencer, MD**

*Department of Medicine, Division of Cardiology, McMaster University, Hamilton, Ontario, Canada. [fspence@mcmaster.ca](mailto:fspence@mcmaster.ca)*

#### **Elie A Akl**

*Department of Internal Medicine, American University of Beirut, Beirut, Lebanon. Department of Clinical Epidemiology and Biostatistics, McMaster University, Hamilton, Ontario, Canada*

*Department of Medicine, State University of New York at Buffalo, Buffalo, New York, USA*

[ea32@aub.edu.lb](mailto:ea32@aub.edu.lb)

#### **Clive Kearon MB, PhD**

*Department of Medicine, Division of Hematology and Thromboembolism, McMaster University, Hamilton, Ontario, Canada [kearonc@mcmaster.ca](mailto:kearonc@mcmaster.ca)*

#### **Ignacio Neumann, MD, MSc,**

*Department of Clinical Epidemiology and Biostatistics, McMaster University, Hamilton, Canada AND Department of Internal Medicine, School of Medicine, Pontificia Universidad Catolica de Chile, Santiago, Chile.*

[ignacio.neumann@gmail.com](mailto:ignacio.neumann@gmail.com)

#### **Sam Schulman, MD, PHD**

*Department of Medicine, Division of Hematology and Thromboembolism, McMaster University, Hamilton, Ontario, Canada. [schulms@mcmaster.ca](mailto:schulms@mcmaster.ca)*

#### **Neera Bhatnaga**

*Health Sciences Library McMaster University, Hamilton, Ontario, Canada.*

[bhatnag@mcmaster.ca](mailto:bhatnag@mcmaster.ca)

#### **Gordon Guyatt, MD**

*Department of Clinical Epidemiology and Biostatistics, McMaster University, Hamilton, Ontario, Canada. [guyatt@mcmaster.ca](mailto:guyatt@mcmaster.ca)*

## Abstract

**Introduction:** Venous thromboembolism (VTE) is a major disease associated with both short term and long-term morbidity and mortality. Patients with a VTE provoked by surgery or immobilization are at low risk of recurrence and do not require long term anticoagulation; those with a VTE and metastatic cancer are at high risk of recurrence and require lifetime thromboprophylaxis. In those at intermediate risk of recurrence, it remains controversial whether prolonging anticoagulation and thus incurring treatment burden and bleeding risk is warranted.

**Methods and Analysis:** We will conduct a systematic review and meta-analysis of RCTs enrolling patients with VTE at intermediate risk of recurrence and evaluating short term anticoagulation (12 weeks to 9 months initial therapy) *versus* longer term anticoagulation (at least 6 months additional anticoagulation beyond the course of treatment in the shorter arm). Anticoagulation could consist of vitamin K antagonists or new oral anticoagulants. Outcomes of interest include recurrent non-fatal thrombosis (deep venous thrombosis and pulmonary embolism), major non-fatal bleeding and mortality. We will systematically search CINAHL, EMBASE, MEDLINE and the Cochrane Central Registry of Controlled Trials. Teams of two reviewers will, independently and in duplicate, screen titles and abstracts and complete full text reviews to determine eligibility, and subsequently abstract data and assess risk of bias in eligible trials. We will conduct meta-analyses to establish the effect of short-term versus long-term anticoagulation on the outcomes of interest and evaluate confidence in estimates (quality of evidence) using the GRADE approach.

**Ethics and dissemination:** Our review will facilitate evidence-based management of patients with unprovoked or recurrent VTE. For purposes of privacy and confidentiality, the systematic review will be limited to studies with de-identified data. The study will be disseminated by peer-review publication and conference presentation.

**Registration:** PROSPERO (CRD42014007620)

**Keywords:** VTE. Duration. Vitamin K antagonist. NOAC. RCT. Meta-analysis

## ARTICLE FOCUS:

In patients who have suffered a venous thromboembolic event (VTE – deep venous thrombosis or pulmonary embolus) at intermediate risk of recurrence (unprovoked or recurrent VTE but not cancer) what is the relative impact of anticoagulation for 3 to 9 months versus indefinite anticoagulation.

## KEY MESSAGE:

We will conduct a systematic review and meta-analysis of RCTs enrolling patients with VTE at intermediate risk of recurrence and evaluating short term anticoagulation (3 to 9 months initial therapy) versus longer term anticoagulation (at least 6 months additional anticoagulation beyond the course of treatment in the shorter arm). Anticoagulation could consist of vitamin K antagonists or new oral anticoagulants. Outcomes of interest will include recurrent non-fatal thrombosis (deep venous thrombosis and pulmonary embolism), major non-fatal bleeding and mortality

## STRENGTHS AND LIMITATIONS OF THIS STUDY

The methods of the review are state-of-art, including explicit eligibility criteria, a comprehensive search, independent duplicate assessment of eligibility, and use of the GRADE approach to assessing confidence in estimates of effect including independent duplicate assessment of risk of bias, precision, consistency, directness and publication bias. Our protocol represents a model for systematic review methods. Our results are likely to be limited by limitations in the primary studies.



## Introduction

Venous thromboembolism (VTE), which comprises deep-vein thrombosis (DVT) and pulmonary embolism (PE), is a major disease that results in considerable morbidity and mortality. Deep venous thrombosis or pulmonary embolism may occur in almost 2 in 1000 people each year and between 5% and 15% of people with untreated DVT may die from pulmonary embolism<sup>1 2</sup>. Thrombosis most commonly affects the deep veins of the lower limbs, but may affect other sites, including the upper limbs. Complications include pulmonary thromboembolism and post-thrombotic syndrome (PTS)<sup>3</sup>.

Risk factors for VTE include immobility, surgery (particularly orthopedic), malignancy, pregnancy, older age, estrogen therapy, and inherited or acquired prothrombotic clotting disorders<sup>4</sup>. In many patients, DVT remains asymptomatic and resolves without complications.. DVTs of concern are those that become symptomatic and are responsible for morbidity and mortality<sup>3</sup>. Patients with extensive proximal DVT have a substantial risk of developing the post-thrombotic syndrome, particularly if there is an ipsilateral recurrence with further valve destruction<sup>5</sup>. The average rate of fatal recurrent VTE after anticoagulation is discontinued has been estimated at 0.3 per 100 patient-years<sup>6</sup>. Based on observational data<sup>7 8</sup>, authors of the ninth iteration of the American College of Chest Physicians antithrombotic guidelines<sup>9</sup> estimated that in patients with unprovoked proximal DVT or PE the risk of recurrence in the first year after discontinuation of anticoagulation is 10% with a risk of 5% per year thereafter (i.e. 30% at 5 years).

A consensus exists regarding the need for anticoagulant treatment, usually with vitamin K antagonists (VKA) or with novel oral anticoagulants (NOAC) for patients with venous thromboembolism. Whereas clinicians agree on the need for 3 to 6 months of anticoagulation after the diagnosis of venous thromboembolism (VTE), opinions regarding optimal duration of secondary prophylaxis differ. Although the prevention of recurrence is certainly desirable, the risk of major bleeding, together with the burden of therapy and cost, makes long-term treatment potentially problematic.

1  
2  
3  
4  
5 The risk-to-benefit ratio is highly dependent of the risk of recurrence of VTE which differs  
6 according to the presence or absence of reversible predisposing factors, location of the  
7 thrombosis, patient age, the presence of comorbid conditions, and intrinsic predispositions to  
8 thrombosis (inherited and acquired thrombophilia disorders). Guidelines suggest that the risk of  
9 recurrence is sufficiently low after a DVT provoked by temporary immobilization or lower limb  
10 fracture that treatment beyond 6 months is not in these patients' best interest. Further, there is  
11 agreement that lifelong anticoagulation is warranted patients at highest risk of recurrence (i.e.,  
12 patients with active metastatic cancer). The controversy regarding treatment beyond 6 months is  
13 restricted to those with intermediate risk<sup>10 11</sup>. These patients include those whose VTE was  
14 unprovoked or whose VTE, if provoked, has happened more than once (recurrent VTE).  
15  
16  
17  
18  
19  
20  
21  
22  
23

24 To make optimal decisions, patients and clinicians need best evidence estimates of benefits and  
25 harms of short versus long-term anticoagulation. In the trials included in previous systematic  
26 reviews of this topic the anticoagulants administered were Vitamin K antagonists<sup>12-15</sup>. Recent  
27 randomized trials have evaluated longer and shorter administration of NOACs. Therefore, we  
28 will update a systematic review and meta-analysis of the relative benefits and harms of longer  
29 versus shorter periods of anticoagulation in patients at intermediate risk of recurrence. Our  
30 primary question will be the impact of indefinite anticoagulation versus discontinuing  
31 anticoagulation after 3 to 9 months on the outcomes of interest. By indefinite anticoagulation we  
32 mean continuing anticoagulation until changes in circumstances would mandate a  
33 discontinuation. For many such patients, we would anticipate lifetime anticoagulation.  
34  
35  
36  
37  
38  
39  
40  
41  
42

## 43 *Methods/design*

### 44 **Protocol and registration**

45 Our protocol is registered on PROSPERO (CRD42014007620), <http://www.crd.york.ac.uk/PROSPERO>.  
46  
47  
48  
49

### 50 **Issues in defining trial eligibility**

51 Trials investigating the effect of prolonged anticoagulation on the risk of VTE recurrence vary in  
52 terms of the duration of anticoagulation in the shorter and longer duration arms. They also differ  
53 in the nature of populations enrolled. These differences create challenges in defining study  
54 eligibility criteria.  
55  
56  
57  
58  
59  
60

1  
2  
3  
4  
5 In defining eligibility criteria any systematic review faces tension between broad eligibility  
6 criteria, which enhance precision of effect estimates and generalizability of results, and narrow  
7 criteria, which decrease the risks of heterogeneity and of generating pooled estimates that are not  
8 applicable to the range of patients and interventions included. A reasonable strategy for dealing  
9 with this tension, which we will adopt, is to choose relatively broad but clinically plausible  
10 criteria and then explore possible sources of heterogeneity. Therefore, although standard shorter-  
11 term anticoagulation is up to 6 months, we are including trials in which the shorter-term arm  
12 received anticoagulation up to 9 months. For the longer-term arm, we will accept any trial in  
13 which the duration of treatment is at least six months longer than in the shorter-term arm. We  
14 will conduct subgroup analyses focusing on the duration of therapy in both the shorter and  
15 longer-term arms.  
16  
17  
18  
19  
20  
21  
22  
23  
24

25 As we described in the background, the controversy regarding duration of anticoagulation is  
26 focused on patients in the intermediate risk category. Typically, these are patients with  
27 unprovoked VTE or recurrent VTE (provoked and unprovoked), but definitions might differ  
28 across trials. Thus, ideally, all patients included in the trials would fall into these risk groups. It  
29 would be inappropriate, however, to exclude trials in which most but not all patients fit this  
30 description. We will include any study in which, according to the definition used in the study at  
31 least 50% of patients fall into one of these risk groups. If there is appreciable heterogeneity in  
32 the proportion of patients in these risk categories we will conduct subgroup analyses based on  
33 this variability.  
34  
35  
36  
37  
38  
39  
40  
41  
42

### 43 Eligibility criteria

#### 44 Inclusion

45 **Patients:** Studies must include patients with DVT and/or PE in whom at least 50% have a first  
46 unprovoked (no apparent clinical risk factor<sup>16</sup> VTE, or a second or subsequent VTE (can be  
47 provoked or unprovoked) in the absence of cancer.  
48  
49  
50  
51  
52

53 **Intervention shorter duration treatment:** Studies must include an arm in which patients are  
54 anticoagulated with either vitamin K antagonists or novel anticoagulants for at least 12 weeks,  
55 but no longer than 9 months.  
56  
57  
58  
59  
60

1  
2  
3  
4  
5 **Intervention longer duration of treatment:** Studies must include an arm in which patients are  
6 anticoagulated with either vitamin K antagonists or novel anticoagulants for at least six months  
7 longer than in the shorter duration treatment arm.  
8  
9

10  
11 **Outcomes:** Trials must report on at least one of the following outcomes: recurrent VTE, DVT,  
12 fatal and non-fatal pulmonary embolus confirmed by objective testing (for DVT, venography or  
13 ultrasonography; for PE radiological imaging including ventilation/perfusion scanning, CT  
14 pulmonary angiography, MRI, conventional angiography, or autopsy), fatal and non-fatal  
15 serious/important bleeding episodes, post thrombotic syndrome, quality of life and total  
16 mortality.  
17  
18  
19  
20  
21

22  
23 **Type of study and design:** We will include only randomized controlled trials (RCT). We will  
24 include two types of RCT designs. In one design, patients, at the outset of VTE, are randomized  
25 to shorter or longer anticoagulation. In the alternative design all patients undergo the short-  
26 course anticoagulation regimen. They are then randomized to stop anticoagulation or to a further  
27 period of anticoagulation. We will include studies in which patients undergo shorter-term  
28 treatment with an anticoagulant, most often VKA, and then receive a new anticoagulant versus  
29 placebo.  
30  
31  
32  
33  
34  
35

### 36 **Exclusion:**

37  
38 We will exclude studies enrolling only pure populations of high-risk patients, such as those with  
39 protein S or C deficiency or anti-phospholipid antibody or antiphospholipid antibody  
40 syndrome pregnancy.  
41  
42  
43  
44

### 45 **Information sources and search**

46  
47 We will screen all RCTs reviewed in the 9th iteration of the American College of Chest  
48 Physicians antithrombotic guidelines and then will conduct additional search from January 2011  
49 forward, six months prior (to account for lag in indexing) to the date the comprehensive search  
50 on the topic for the 9<sup>th</sup> iteration ACCP antithrombotic guidelines. We will search OVID Medline,  
51 EMBASE, Cochrane Central Registry of Controlled Trials (CENTRAL) and CINAHL with no  
52 language restriction. An experienced librarian (NB) developed a sensitive search strategy for this  
53  
54  
55  
56  
57  
58  
59  
60  
(see ~~Additional file anticoag vte medline strategy~~ Appendix 1). We will scan the bibliographies

1  
2  
3  
4  
5 of all systematic reviews and meta-analyses as well as all eligible primary studies for additional  
6 relevant articles.  
7  
8  
9

### 10 11 **Study selection**

12  
13  
14 Following a calibration exercise, reviewers will work in pairs to screen, independently and in  
15 duplicate, titles and available abstracts of identified citations. We will acquire the full text  
16 publication of any article that either reviewer judges as potentially eligible. The same reviewer  
17 teams will, following a second calibration exercise, independently apply eligibility criteria to the  
18 full text of potentially eligible trials using standardized forms. They will resolve disagreements  
19 by consensus or, if a discrepancy remains, through discussion with an arbitrator (GHG). ). We  
20 will measure inter-rater agreement for full text eligibility and assessment of risk of bias using the  
21 Kappa statistics. Values of kappa between 0.40 and 0.59 have been considered to reflect fair  
22 agreement, between 0.60 and 0.74 to reflect good agreement and 0.75 or more to reflect excellent  
23 agreement<sup>17</sup>.  
24  
25  
26  
27  
28  
29  
30  
31  
32

### 33 **Data collection process and data items**

34  
35 Using pilot tested standardized forms and following a calibration exercise, teams of two  
36 reviewers will extract data independently and in duplicate from each eligible study. Data  
37 abstracted will include details on the study methodology, participants, intervention, control, and  
38 all reported patient-important outcomes. For each outcome, we will record number of patients  
39 enrolled in each study arm, and the number of patients for whom final follow-up data is  
40 available, and the number of events in each study group.  
41  
42  
43  
44  
45

46 Reviewers will resolve disagreements by discussion, and one arbitrator (GHG) will adjudicate  
47 unresolved disagreements. We will contact the authors of each study to clarify any issues of  
48 uncertainty in the data abstraction and to ensure that our abstraction is correct.  
49  
50

51 Reviewers will independently extract details of the anticoagulation regimens in both the shorter  
52 and longer duration arms. Outcomes will include death; cause-specific mortality (PE or  
53 bleeding); recurrent non-fatal VTE (DVT and pulmonary embolus) and non-fatal  
54  
55  
56  
57  
58  
59  
60

1  
2  
3  
4  
5 serious/important bleeding. We will document definitions of serious/important bleeding in each  
6  
7 study.

### 11 **Risk of bias in individual studies**

12  
13 Reviewers will assess risk of bias within each study with a modified Cochrane risk of bias  
14 instrument<sup>18</sup> which assesses the following key domains: randomization sequence generation;  
15 allocation concealment; blinding of participants, healthcare professionals, outcome assessors,  
16 data collectors, and data analysts; incomplete outcome data; selective outcome reporting; and  
17 other sources of bias which will include differential intensity of surveillance for VTE and  
18 bleeding in the short and long arms, and premature cessation of follow-up (for instance, no  
19 follow-up for bleeding in the short arm after a VTE and resumption of anticoagulation). We will  
20 consider as a criterion of risk of bias whether the investigators specify a total surveillance period  
21 equal in length for the longer and shorter arms (i.e., same follow-up period from the time of  
22 randomization) versus a total surveillance period that is different (e.g., same follow-up period  
23 from the time of stopping anticoagulation) or not specified. Reviewers will input response  
24 options of ‘definitely yes’, ‘probably yes’, ‘probably no’, and ‘definitely no’ for each of the  
25 domains, with ‘definitely yes’ and ‘probably yes’ ultimately assigned low risk of bias and  
26 ‘definitely no’ and ‘probably no’ assigned high risk of bias<sup>19</sup>. Reviewers will resolve  
27 disagreements by discussion, and one arbitrator (GHG) will adjudicate unresolved  
28 disagreements.

### 44 **Meta-analysis and data synthesis**

45  
46 Data regarding VTE, serious/important bleeding, mortality and person-time at risk will be  
47 extracted by 2 independent reviewers using a standardized form, with adjudication by a third  
48 reviewer in cases of disagreement. Given our primary interest in short term versus indefinite  
49 anticoagulation, in studies with follow-up after discontinuation of anticoagulation in the long  
50 arm, we will try to identify events that occurred in either arm after the scheduled discontinuation  
51 of anticoagulation in the long arm. We will exclude such events in the primary analysis.  
52  
53  
54  
55  
56  
57  
58  
59  
60

1  
2  
3  
4  
5 For each study, incidence rates in events per person-year at risk will be calculated for the  
6 outcomes of recurrent VTE and serious/important bleeding. We have chosen events per person-  
7 years rather than number of people with events to account for differential length of follow-up  
8 within individual studies and across studies, and the possibility of multiple events in a single  
9 individual. When investigators do not report person-time data (either directly or indirectly  
10 through a Kaplan-Meier survival curve), the person-time of the interval will be estimated by  
11 multiplying the number of participants present at the beginning of the interval by the duration of  
12 the interval and subtracting person-time for events occurring within the interval. For this  
13 calculation we will assume that events will be equally likely throughout the interval unless data  
14 to the contrary are in the report.

15  
16  
17  
18  
19  
20  
21  
22 Our estimates of study heterogeneity will be informed using the p-value for  $\chi^2$  for  
23 heterogeneity, and the  $I^2$  statistic where 0-40% may be unimportant heterogeneity, 30-60%  
24 moderate, 50-90% substantial and 75-100% considerable heterogeneity<sup>44</sup>. We will explore  
25 heterogeneity by conducting the five a priori subgroup analyses using a z-test to test for  
26 interaction<sup>20</sup>.

### 27 28 29 30 31 32 33 **Assessment of heterogeneity and subgroup analyses**

34  
35 We will explore heterogeneity using sub-group hypotheses, which apply to bleeding and VTE  
36 outcomes and mortality and are framed as effects in longer versus shorter duration  
37 anticoagulation. We postulate that larger reductions in thrombosis, and larger increases in  
38 bleeding, will occur in the following situations: i) when the shorter duration anticoagulation arm  
39 is three months or less versus longer than 3 months; ii) when the longer duration anticoagulation  
40 arm is more than 12 months longer than the shorter duration arm versus 12 months or less;; iii)  
41 studies in which the number of risk of bias domains judged as 'high risk' is greater than the  
42 median will have larger effects than studies in which that number is less than the median. iv)  
43 when therapy is a NOAC versus warfarin with target INR 2.0 or greater) versus warfarin lower  
44 boundary of target INR less than 2.0); v) when anticoagulation was continued until the end of the  
45 study or in which we can exclude events that occurred in either arm after timing of cessation of  
46 anticoagulation in the long arm versus follow-up continued after anticoagulant stopped and not  
47  
48  
49  
50  
51  
52  
53  
54  
55  
56  
57  
58  
59  
60



possible to identify and exclude events that occurred after cessation of anticoagulation in the long arm.

### Confidence in pooled estimates of effect

Two reviewers will, independently and in duplicate, assess the confidence in effect estimates for each outcome using the GRADE (Grading of Recommendations, Assessment, Development and Evaluation) rating system<sup>21</sup>. In the GRADE system of rating quality of evidence for each outcome, randomized trials begin as high quality evidence, but may be rated down by one or more of five categories of limitations<sup>22</sup>. The GRADE working group has provided detailed guidance regarding judgments for each of these criteria: (1) risk of bias<sup>23</sup>, (2) inconsistency<sup>24</sup>, (3) indirectness<sup>25</sup>, (4) imprecision<sup>26</sup>, and (5) publication bias<sup>27</sup>.

For assessing the impact of loss to follow-up across studies, we will conduct sensitivity analyses making progressively more stringent assumptions regarding loss to follow-up in intervention and control groups. The extent to which point estimates and confidence intervals differ in these sensitivity analyses will determine whether we rate down for risk of bias<sup>28</sup>.

We anticipate that “number of patients enrolled minus number of patients for whom final follow-up is available” may include: i. unexplained losses to follow-up (lost contact), ii. explained losses to follow-up (e.g., followed until patient moved), iii. Followed until they had a recurrent VTE (or lost to follow-up for other complications such as death, or bleeding from restarted anticoagulation).

With respect to precision, the GRADE guidance notes that meta-analyses of small trials can provide evidence of benefit with confidence intervals that appear to convincingly exclude no effect; however, the results of reviews of such studies have often been subsequently refuted by larger trials<sup>26</sup>. To address this potential concern in cases in which our meta-analysis suggests benefit but the sample size is less than the optimal information size (OIS; the number of patients generated by a conventional sample size calculation for a single trial) we will rate down the quality for imprecision. For the purposes of calculating the OIS we will assume, for binary

1  
2  
3  
4  
5 variables a relative risk reduction or increase (delta) of 25%, an alpha of 0.05, and a beta of 0.20,  
6 and a median baseline risk from the available studies.  
7  
8  
9

10 For each outcome we will assess publication bias by visually observing asymmetry of the funnel  
11 plot for each outcome. We will follow published guidance and conduct the funnel plot inquiry  
12 only for outcomes with 10 or more trials<sup>27</sup>.  
13  
14  
15

- 16
- 17
- 18 • After considering these reasons for rating down, reviewers will judge the overall  
19 confidence in estimates of effect for each outcome as follows:  
20
- 21 • ‘high’ quality of evidence (we are very confident that the true effect lies close to that of  
22 the estimate of the effect);  
23
- 24 • ‘moderate’ quality of evidence (we are moderately confident in the effect estimate and  
25 the true effect is likely to be close to the estimate of the effect, but there is a possibility  
26 that it is substantially different);  
27
- 28 • ‘low’ quality of evidence (our confidence in the effect estimate is limited and the true  
29 effect may be substantially different from the estimate of the effect); and  
30
- 31 • ‘very low’ quality of evidence (we have very little confidence in the effect estimate and  
32 the true effect is likely to be substantially different from the estimate of effect)<sup>22</sup>.  
33  
34  
35  
36

37 Again, we will follow GRADE guidance for overall confidence ratings<sup>29</sup>.  
38  
39

40 For both individual domains and overall confidence, if raters disagree they will try to resolve by  
41 consensus and, if not successful, the final judgment will be made by an independent reviewer  
42 (GHG).  
43  
44  
45

### 46 47 **Presentation of Results**

48 We will present the results of our meta-analyses in an Evidence Profile that will provide a  
49 succinct, easily digestible presentation of quality of evidence and magnitude of effects<sup>30</sup>. Our  
50 Evidence Profile will be constructed to include the following elements:  
51  
52  
53  
54  
55  
56  
57  
58  
59  
60

1. A measure of the typical burden of these outcomes (e.g. control group, estimated risk; if appropriate studies are available we will use the baseline risk for population-based observational studies);
2. A measure of the difference between the risks with and without intervention
3. The relative magnitude of effect;
4. Numbers of participants and studies addressing these outcomes;
5. A rating of the overall confidence in estimate of effect for each outcome and any reasons for rating down the confidence

## Discussion

The decision to continue anticoagulant treatment in patients with VTE at moderate risk of recurrence beyond the first few months is based on the patients' and treating physician's perception of the benefits and harms. The risks of recurrent VTE and bleeding associated with different lengths of vitamin K antagonist treatment have been evaluated in several studies that randomly allocated patients with venous thromboembolism to receive different lengths of treatment. These studies, subsequently summarized in systematic reviews, were modest in number and of relatively small sample size. Since these studies were completed, new trials have compared shorter and longer duration of treatment with novel anticoagulants. Since the impact of these newer agents on both thrombosis and bleeding is similar to that of warfarin, by including these studies in a new systematic review, we will be able to increase precision and narrow confidence intervals, allowing an improved estimate of effects on thrombosis and bleeding.

Our protocol represents a model for systematic review methods. We have planned standard methods that yield credible results, including explicit eligibility criteria, a comprehensive search, and duplicate assessment of eligibility and risk of bias. We have also planned implementation of methods seldom (a priori hypotheses to explain possible effect modification, including specification of direction of effect) or very seldom (use of the GRADE approach to rating confidence in estimates of effect) implemented in current systematic reviews.

Our review presents several unique challenges. One involves the specification of the study

1  
2  
3  
4  
5 question, and the implications of that specification. Relevant studies used two different designs:  
6 short versus longer anticoagulation in which patients in the long arm continued anticoagulation  
7 until the end of the study, and short versus fixed longer anticoagulation with continued follow-up  
8 after anticoagulation was discontinued. We have decided we are interested in the relative impact  
9 of short versus indefinite - rather than fixed longer duration - anticoagulation. This will require  
10 exclusion of events in the latter study design that occurred - in both short and long arms - after  
11 the end of the longer arm planned anticoagulation. [Reported data may limit our ability to carry](#)  
12 [out this exclusion as would be optimal.](#)  
13  
14  
15  
16  
17  
18  
19

20 [Our study is likely to be limited by other aspects of study design and reporting of the primary](#)  
21 [studies. In particular, though we are interested in the impact of indefinite versus limited](#)  
22 [anticoagulation, studies will have limited follow-up, often 2 to 3 years. Both bleeding and event](#)  
23 [rates in the second and third years will, however, provide a useful estimate of what is liable to](#)  
24 [happen in subsequent years. Another important limitation is that we will not have access to](#)  
25 [individual patient data and therefore subgroup analysis and inferences will be limited.](#)  
26  
27  
28  
29  
30  
31  
32  
33

34 In conclusion, patients and clinicians choosing between limited and indefinite duration of  
35 anticoagulation after VTE deserve access to best estimates of effect derived from the complete  
36 current literature. Our review will provide these estimates.  
37  
38  
39  
40  
41  
42  
43  
44  
45  
46  
47  
48  
49  
50  
51  
52  
53  
54  
55  
56  
57  
58  
59  
60

## Competing interests

John Eikelboom has taken the position that anticoagulation should not be used long-term in the patient population of interest and has tested aspirin in this context. Schulman is director of an Anticoagulation Clinic. Clive Kearon led the development of American College of Chest Physicians antithrombotic guidelines addressing anticoagulants use in this population and Gordon Guyatt edited the 9th edition of these guidelines.

## Authors' contributions

LCL, GHG, JE, SS, FS, CK and EA conceived the study design. NB and IN designed the database-specific literature search strategies. GHG and LCL completed the first draft of the manuscript. All authors reviewed several drafts of the manuscript and approved the final version.

## Acknowledgements

Dr Kearon is supported by the Jack Hirsh Professorship in Thromboembolism and an Investigator Award from the Heart and Stroke Foundation of Ontario.

## List of abbreviations

Venous thromboembolism (VTE)

Randomized controlled Trials (RCTs)

Grading of Recommendations, Assessment, Development and Evaluation (GRADE)

novel oral anticoagulants (NOAC)

pulmonary embolism (PE)

deep-vein thrombosis (DVT)

vitamin K antagonists (VKA)

optimal information size (OIS)

## References

1. McManus RJ, Fitzmaurice DA, Murray E, et al. Thromboembolism. Clinical evidence 2011;**2011**.
2. Naess IA, Christiansen SC, Romundstad P, et al. Incidence and mortality of venous thrombosis: a population-based study. *Journal of thrombosis and haemostasis : JTH* 2007;**5**(4):692-9.
3. National Guideline C. Prevention and management of venous thromboembolism. A national clinical guideline. Secondary Prevention and management of venous thromboembolism. A national clinical guideline. <http://www.guideline.gov/content.aspx?id=25639>.
4. British Thoracic Society guidelines for the management of suspected acute pulmonary embolism. *Thorax* 2003;**58**(6):470-83.
5. Prandoni P, Villalta S, Bagatella P, et al. The clinical course of deep-vein thrombosis. Prospective long-term follow-up of 528 symptomatic patients. *Haematologica* 1997;**82**(4):423-8.
6. Carrier M, Le Gal G, Wells PS, et al. Systematic review: case-fatality rates of recurrent venous thromboembolism and major bleeding events among patients treated for venous thromboembolism. *Annals of internal medicine* 2010;**152**(9):578-89.
7. Prandoni P, Noventa F, Ghirarduzzi A, et al. The risk of recurrent venous thromboembolism after discontinuing anticoagulation in patients with acute proximal deep vein thrombosis or pulmonary embolism. A prospective cohort study in 1,626 patients. *Haematologica* 2007;**92**(2):199-205.
8. Rodger MA, Kahn SR, Wells PS, et al. Identifying unprovoked thromboembolism patients at low risk for recurrence who can discontinue anticoagulant therapy. *CMAJ : Canadian Medical Association journal = journal de l'Association medicale canadienne* 2008;**179**(5):417-26.
9. Kearon C, Akl EA, Comerota AJ, et al. Antithrombotic therapy for VTE disease: Antithrombotic Therapy and Prevention of Thrombosis, 9th ed: American College of Chest Physicians Evidence-Based Clinical Practice Guidelines. *Chest* 2012;**141**(2 Suppl):e419S-94S.
10. Kearon C, Iorio A, Palareti G, et al. Risk of recurrent venous thromboembolism after stopping treatment in cohort studies: recommendation for acceptable rates and standardized reporting. *Thromb Haemost* 2010;**8**:2313-5.
11. Kearon C. A conceptual framework for two phases of anticoagulant treatment of venous thromboembolism. *J Thromb Haemost* 2012;**10**:507-11.
12. East AT, Wakefield TW. What is the optimal duration of treatment for DVT? An update on evidence-based medicine of treatment for DVT. *Seminars in vascular surgery* 2010;**23**(3):182-91.
13. Holbrook A, Schulman S, Witt DM, et al. Evidence-based management of anticoagulant therapy: Antithrombotic Therapy and Prevention of Thrombosis, 9th ed: American College of Chest Physicians Evidence-Based Clinical Practice Guidelines. *Chest* 2012;**141**(2 Suppl):e152S-84S.
14. Boutitie F, Pinede L, Schulman S, et al. Influence of preceding length of anticoagulant treatment and initial presentation of venous thromboembolism on risk of recurrence after

- 1  
2  
3  
4  
5 stopping treatment: analysis of individual participants' data from seven trials. *Bmj*  
6 2011;**342**:d3036.
- 7  
8 15. van Dongen CJ, Vink R, Hutten BA, et al. The incidence of recurrent venous  
9 thromboembolism after treatment with vitamin K antagonists in relation to time since  
10 first event: a meta-analysis. *Archives of internal medicine* 2003;**163**(11):1285-93.
- 11 16. Kearon C, Kahn SR, Agnelli G, et al. Antithrombotic therapy for venous thromboembolic  
12 disease: American College of Chest Physicians Evidence-Based Clinical Practice  
13 Guidelines (8th Edition). *Chest* 2008;**133**(6 Suppl):454S-545S.
- 14 17. RG O. Evaluating coding decisions. In: Cooper H, Hedges LV (editors). *The Handbook of*  
15 *Research Synthesis*. New York (NY): Russell Sage Foundation, 1994.
- 16 18. Busse JW, Guyatt G. Modification of Cochrane Tool to assess risk of bias in randomized  
17 trials. . <http://distillercercom/resources/> 2013.
- 18 19. Akl EA, Sun X, Busse JW, et al. Specific instructions for estimating unclearly reported  
19 blinding status in randomized trials were reliable and valid. *Journal of clinical*  
20 *epidemiology* 2012;**65**(3):262-7.
- 21 20. Altman DG, Bland JM. Interaction revisited: the difference between two estimates. *BMJ*  
22 (Clinical research ed) 2003;**326**(7382):219.
- 23 21. Atkins D, Best D, Briss PA, et al. Grading quality of evidence and strength of  
24 recommendations. *BMJ (Clinical research ed)* 2004;**328**(7454):1490.
- 25 22. Guyatt GH, Oxman AD, Vist GE, et al. GRADE: an emerging consensus on rating quality of  
26 evidence and strength of recommendations. *BMJ (Clinical research ed)*  
27 2008;**336**(7650):924-6.
- 28 23. Guyatt GH, Oxman AD, Vist G, et al. GRADE guidelines: 4. Rating the quality of evidence--  
29 study limitations (risk of bias). *Journal of clinical epidemiology* 2011;**64**(4):407-15.
- 30 24. Guyatt GH, Oxman AD, Kunz R, et al. GRADE guidelines: 7. Rating the quality of  
31 evidence--inconsistency. *Journal of clinical epidemiology* 2011;**64**(12):1294-302.
- 32 25. Guyatt GH, Oxman AD, Kunz R, et al. GRADE guidelines: 8. Rating the quality of  
33 evidence--indirectness. *Journal of clinical epidemiology* 2011;**64**(12):1303-10.
- 34 26. Guyatt GH, Oxman AD, Kunz R, et al. GRADE guidelines 6. Rating the quality of evidence--  
35 -imprecision. *Journal of clinical epidemiology* 2011;**64**(12):1283-93.
- 36 27. Guyatt GH, Oxman AD, Montori V, et al. GRADE guidelines: 5. Rating the quality of  
37 evidence--publication bias. *Journal of clinical epidemiology* 2011;**64**(12):1277-82.
- 38 28. Akl EA, Johnston BC, Alonso-Coello P, et al. Addressing dichotomous data for participants  
39 excluded from trial analysis: a guide for systematic reviewers. *PloS one*  
40 2013;**8**(2):e57132.
- 41 29. Guyatt G, Oxman AD, Sultan S, et al. GRADE guidelines: 11. Making an overall rating of  
42 confidence in effect estimates for a single outcome and for all outcomes. *Journal of*  
43 *clinical epidemiology* 2013;**66**(2):151-7.
- 44 30. Guyatt GH, Oxman AD, Santesso N, et al. GRADE guidelines: 12. Preparing summary of  
45 findings tables-binary outcomes. *Journal of clinical epidemiology* 2013;**66**(2):158-72.
- 46  
47  
48  
49  
50  
51  
52  
53  
54  
55  
56  
57  
58  
59  
60



1  
2  
3 Database: Ovid MEDLINE(R) In-Process & Other Non-Indexed Citations, Ovid MEDLINE(R) Daily  
4 and Ovid MEDLINE(R) <1946 to Present>

5 Search Strategy:  
6  
7  
8 -----  
9

10 1 exp Coumarins/  
11 2 (coumarin\$ or chromonar or coumestrol or esculin or isocoumarin\$ or psoralens or  
12 pyranocoumarins or umbelliferones).mp.  
13  
14 3 warfarin.mp. or Warfarin/ or warfant.mp.  
15  
16 4 (coumadine or warfant or coumadin or marevan or aldocumar or tedicumar).mp.  
17  
18 5 Acenocoumarol/ or acenocoumarol\*.mp.  
19  
20 6 (Pradaxa or Dabigatran).mp.  
21  
22 7 (Rivaroxaban or Xarelto).mp.  
23  
24 8 (vitamin k adj3 antagonis\*).mp.  
25  
26 9 vitamin k/ai  
27  
28 10 (vk adj2 antagonis\*).mp.  
29  
30 11 (endosaban or apixaban).mp.  
31  
32 12 BAY 59-7939.mp.  
33  
34 13 (BMS-562247 or edoxaban or DU-176b or betrixaban).mp.  
35  
36 14 YM150.mp.  
37  
38 15 TAK-442.mp.  
39  
40 16 LY517717.mp.  
41  
42 17 PD0348292.mp.  
43  
44 18 (VKA or VKAs).mp.  
45  
46 19 (NOACs or noac).mp.  
47  
48 20 (DOACs or doac).mp.  
49  
50 21 ((new or novel or direct) adj4 (oral anticoag\* or oral anti coag\*)).mp.  
51  
52 22 ((novel or new) adj2 (anticoag: or anti coag:)).mp.  
53  
54 23 or/1-22  
55  
56 24 thrombosis.mp. or exp Thrombosis/  
57  
58 25 exp Venous Thromboembolism/ or exp Thromboembolism/ or Thromboembolism.mp.  
59  
60 26 pulmonary embolism.mp. or exp Pulmonary Embolism/  
27 (PE or DVT or VTE).mp.  
28 ((vein\* or ven\*) adj2 thromb\*).mp.  
29 (thrombu\* or thrombotic\* or thrombolic\* or thromboemb\* or thrombo\* or embol\*).mp.  
30 or/24-29  
31 randomized controlled trial.pt.  
32 random allocation/

1  
2  
3  
4 33 double-blind method/  
5 34 single-blind method/  
6 35 randomi?ed controlled trial\$.mp.  
7 36 Randomi?ed clinical trial\$.mp.  
8 37 controlled clinical trial.pt.  
9 38 ((singl\$ or double\$ or trebl\$ or tripl\$) adj25 (blind\$ or mask\$)).mp.  
10 39 random\$.mp.  
11 40 placebo\$.mp.  
12 41 cross-over studies.sh.  
13 42 latin square:.tw.  
14 43 or/31-42  
15 44 animals/ not humans/  
16 45 43 not 44  
17 46 23 and 30 and 45  
18 47 (2008\* or 2009\* or 2010\* or 2011\* or 2012\* or 2013\*).em,ed,dc.  
19 48 46 and 47  
20  
21  
22  
23  
24  
25  
26  
27  
28  
29  
30  
31  
32  
33  
34  
35  
36  
37  
38  
39  
40  
41  
42  
43  
44  
45  
46  
47  
48  
49  
50  
51  
52  
53  
54  
55  
56  
57  
58  
59  
60

\*\*\*\*\*



# PRISMA 2009 Checklist

1  
2  
3  
4  
5  
6  
7  
8  
9  
10  
11  
12  
13  
14  
15  
16  
17  
18  
19  
20  
21  
22  
23  
24  
25  
26  
27  
28  
29  
30  
31  
32  
33  
34  
35  
36  
37  
38  
39  
40  
41  
42  
43  
44  
45  
46  
47  
48  
49

| Section/topic                      | #  | Checklist item                                                                                                                                                                                                                                                                                              | Reported on page # |
|------------------------------------|----|-------------------------------------------------------------------------------------------------------------------------------------------------------------------------------------------------------------------------------------------------------------------------------------------------------------|--------------------|
| <b>TITLE</b>                       |    |                                                                                                                                                                                                                                                                                                             |                    |
| Title                              | 1  | Identify the report as a systematic review, meta-analysis, or both.                                                                                                                                                                                                                                         | 1                  |
| <b>ABSTRACT</b>                    |    |                                                                                                                                                                                                                                                                                                             |                    |
| Structured summary                 | 2  | Provide a structured summary including, as applicable: background; objectives; data sources; study eligibility criteria, participants, and interventions; study appraisal and synthesis methods; results; limitations; conclusions and implications of key findings; systematic review registration number. | 2                  |
| <b>INTRODUCTION</b>                |    |                                                                                                                                                                                                                                                                                                             |                    |
| Rationale                          | 3  | Describe the rationale for the review in the context of what is already known.                                                                                                                                                                                                                              | 4,5                |
| Objectives                         | 4  | Provide an explicit statement of questions being addressed with reference to participants, interventions, comparisons, outcomes, and study design (PICOS).                                                                                                                                                  | 5                  |
| <b>METHODS</b>                     |    |                                                                                                                                                                                                                                                                                                             |                    |
| Protocol and registration          | 5  | Indicate if a review protocol exists, if and where it can be accessed (e.g., Web address), and, if available, provide registration information including registration number.                                                                                                                               | 5                  |
| Eligibility criteria               | 6  | Specify study characteristics (e.g., PICOS, length of follow-up) and report characteristics (e.g., years considered, language, publication status) used as criteria for eligibility, giving rationale.                                                                                                      | 6                  |
| Information sources                | 7  | Describe all information sources (e.g., databases with dates of coverage, contact with study authors to identify additional studies) in the search and date last searched.                                                                                                                                  | 7                  |
| Search                             | 8  | Present full electronic search strategy for at least one database, including any limits used, such that it could be repeated.                                                                                                                                                                               | 7                  |
| Study selection                    | 9  | State the process for selecting studies (i.e., screening, eligibility, included in systematic review, and, if applicable, included in the meta-analysis).                                                                                                                                                   | 8                  |
| Data collection process            | 10 | Describe method of data extraction from reports (e.g., piloted forms, independently, in duplicate) and any processes for obtaining and confirming data from investigators.                                                                                                                                  | 8                  |
| Data items                         | 11 | List and define all variables for which data were sought (e.g., PICOS, funding sources) and any assumptions and simplifications made.                                                                                                                                                                       | 8                  |
| Risk of bias in individual studies | 12 | Describe methods used for assessing risk of bias of individual studies (including specification of whether this was done at the study or outcome level), and how this information is to be used in any data synthesis.                                                                                      | 9                  |
| Summary measures                   | 13 | State the principal summary measures (e.g., risk ratio, difference in means).                                                                                                                                                                                                                               | 9                  |
| Synthesis of results               | 14 | Describe the methods of handling data and combining results of studies, if done, including measures of consistency (e.g., $I^2$ for each meta-analysis).                                                                                                                                                    | 12, 13             |



# PRISMA 2009 Checklist

Page 1 of 2

| Section/topic                 | #  | Checklist item                                                                                                                                                                                           | Reported on page # |
|-------------------------------|----|----------------------------------------------------------------------------------------------------------------------------------------------------------------------------------------------------------|--------------------|
| Risk of bias across studies   | 15 | Specify any assessment of risk of bias that may affect the cumulative evidence (e.g., publication bias, selective reporting within studies).                                                             | 9                  |
| Additional analyses           | 16 | Describe methods of additional analyses (e.g., sensitivity or subgroup analyses, meta-regression), if done, indicating which were pre-specified.                                                         | 10, 11, 12         |
| <b>RESULTS</b>                |    |                                                                                                                                                                                                          |                    |
| Study selection               | 17 | Give numbers of studies screened, assessed for eligibility, and included in the review, with reasons for exclusions at each stage, ideally with a flow diagram.                                          | --                 |
| Study characteristics         | 18 | For each study, present characteristics for which data were extracted (e.g., study size, PICOS, follow-up period) and provide the citations.                                                             | ---                |
| Risk of bias within studies   | 19 | Present data on risk of bias of each study and, if available, any outcome level assessment (see item 12).                                                                                                | --                 |
| Results of individual studies | 20 | For all outcomes considered (benefits or harms), present, for each study: (a) simple summary data for each intervention group (b) effect estimates and confidence intervals, ideally with a forest plot. | --                 |
| Synthesis of results          | 21 | Present results of each meta-analysis done, including confidence intervals and measures of consistency.                                                                                                  | --                 |
| Risk of bias across studies   | 22 | Present results of any assessment of risk of bias across studies (see Item 15).                                                                                                                          | --                 |
| Additional analysis           | 23 | Give results of additional analyses, if done (e.g., sensitivity or subgroup analyses, meta-regression [see Item 16]).                                                                                    | --                 |
| <b>DISCUSSION</b>             |    |                                                                                                                                                                                                          |                    |
| Summary of evidence           | 24 | Summarize the main findings including the strength of evidence for each main outcome; consider their relevance to key groups (e.g., healthcare providers, users, and policy makers).                     | --                 |
| Limitations                   | 25 | Discuss limitations at study and outcome level (e.g., risk of bias), and at review-level (e.g., incomplete retrieval of identified research, reporting bias).                                            | --                 |
| Conclusions                   | 26 | Provide a general interpretation of the results in the context of other evidence, and implications for future research.                                                                                  | --                 |
| <b>FUNDING</b>                |    |                                                                                                                                                                                                          |                    |
| Funding                       | 27 | Describe sources of funding for the systematic review and other support (e.g., supply of data); role of funders for the systematic review.                                                               | 1, 14              |

From: Moher D, Liberati A, Tetzlaff J, Altman DG, The PRISMA Group (2009). Preferred Reporting Items for Systematic Reviews and Meta-Analyses: The PRISMA Statement. PLoS Med 6(6): e1000097. doi:10.1371/journal.pmed1000097

For more information, visit: [www.prisma-statement.org](http://www.prisma-statement.org).

Page 2 of 2  
For peer review only - <http://bmjopen.bmj.com/site/about/guidelines.xhtml>
